# Supplementary material for: The catalytic aerobic synthesis of quaternary α-hydroxy phosphonates via direct hydroxylation of phosphonate compounds
Source: Royal Society of Chemistry journal article supplement (doi:10.1039/c4nj02072c), 2015-01-01
Supplement: c4nj02072c1.pdf [file c4nj02072c1.pdf]

# Catalytic Aerobic Synthesis of Quaternary $\alpha$ -Hydroxy phosphonates via Direct Hydroxylation of Phosphonate Compounds

Lijun Gu,<sup>\*a</sup> Cheng Jin<sup>b</sup> and Hongtao Zhang<sup>a</sup>

<sup>a</sup>*Key Laboratory of Chemistry in Ethnic Medicinal Resources, State Ethnic Affairs Commission & Ministry of Education, Yunnan Minzu University, Kunming, Yunnan, 650500, China*

<sup>b</sup>*New United Group Company Limited, Changzhou, Jiangsu, 213166, China.*

## Supporting Information

### List of Contents

**(A) Materials and equipment**

**(B) Typical experimental procedure**

**(C) Labeling experiments**

**(D) Analytical data**

**(E) References**

**(F) Spectra**

## (A) Materials and equipment

Reagents were obtained commercially and used as received. Solvents were purified and dried by standard methods. For substrates **1** were prepared according the literature methods.<sup>1</sup> <sup>1</sup>H NMR spectra were recorded on a Bruker-400 NMR spectrometer using TMS as an internal standard. Chemical shift values ( $\delta$ ) are given in ppm. Coupling constants ( $J$ ) were measured in Hz. GC-MS analyses were performed on a SHIMADZU QP2010. High Resolution mass spectrometer (HRMS) spectra were recorded on a Bruker micrOTOF-Q II analyzer. 200-300 mesh silica gel was used for column chromatography.

## (B) Typical experimental procedure

### Typical experimental procedure for the synthesis of quaternary $\alpha$ -hydroxy phosphonates

An oven-dried Schlenk tube was charged with a magnetic stir-bar, phosphonates **1** (0.3 mmol),  $\text{CuCl}_2 \cdot 2\text{H}_2\text{O}$  (0.045 mmol), NHPI (0.03 mmol),  $\text{PPh}_3$  (0.36 mmol),  $\text{CH}_3\text{CN}$  (2 mL), The tube was sealed, and oxygen was purged through syringe. Reaction was stirred at 100 °C for 8-10 h. After the reaction was finished, the reaction mixture was diluted in 30 mL ethyl acetate, filtered on celite pad. The organic portion was washed with a saturated solution of brine (8 mL $\times$ 3), dried ( $\text{Na}_2\text{SO}_4$ ) and concentrated in vacuum, and the resulting residue was purified by silica gel column chromatography (hexane/ethyl acetate) to afford the desired products **2**.

## (C) Labeling experiments

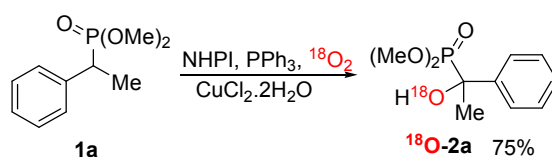

Reaction conditions: **1a** (0.3 mmol),  $\text{CuCl}_2 \cdot 2\text{H}_2\text{O}$  (5 mol%), NHPI (10 mol%),  $\text{CH}_3\text{CN}$  (2.0 mL), 100 °C in  $^{18}\text{O}_2$  atmosphere (1 atm) for 10 h.

The HRMS spectra of **2a** for the reaction under  $^{18}\text{O}_2$  (95%).

## Generic Display Report

### Analysis Info

Analysis Name D:\Data\hnl\G LO011721-2.d  
Method tune\_150-800.m  
Sample Name G LO011721-2  
Comment

Acquisition Date 7/28/2014 12:26:32 PM

Operator EDAL@DE  
Instrument micrOTOF-Q II

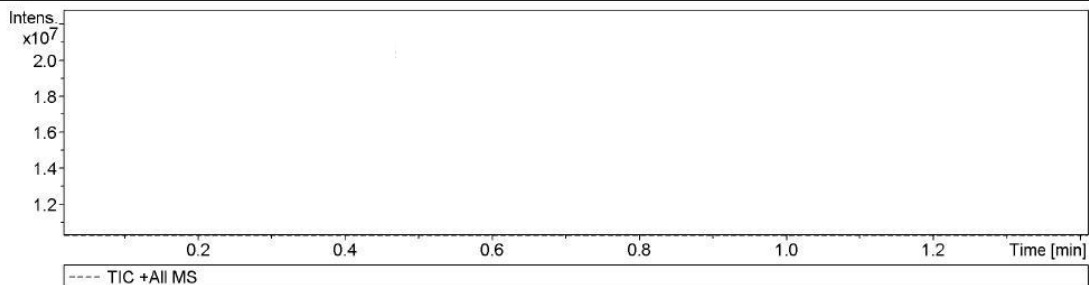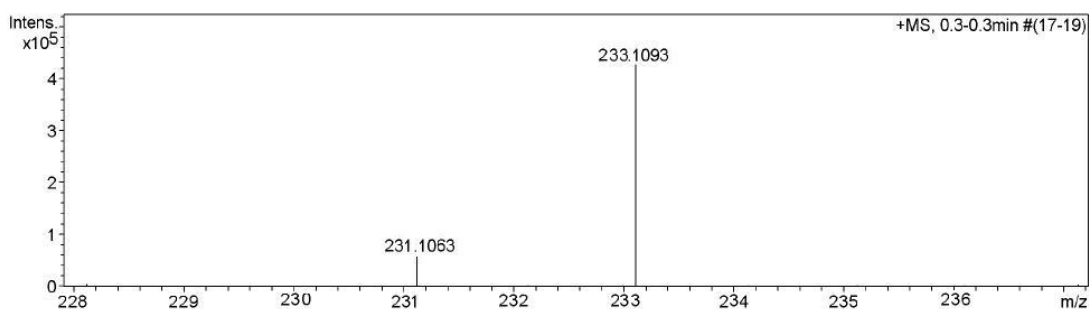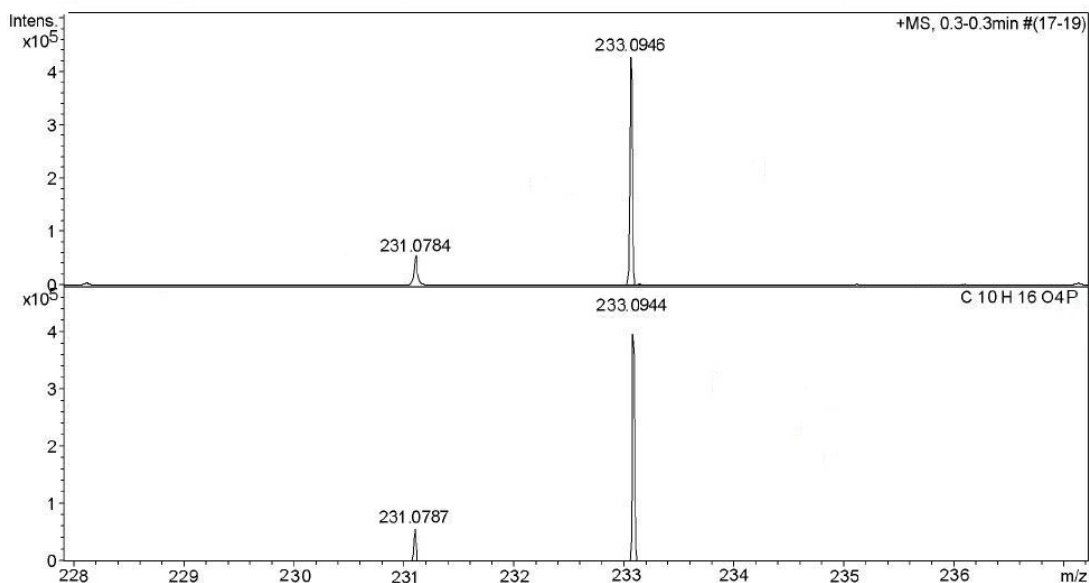

### (D) Analytical data

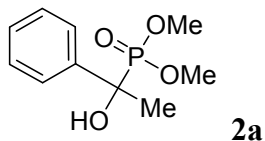

### Dimethyl 1-hydroxy-1-phenylethylphosphonate (2a): <sup>2</sup>

<sup>1</sup>H NMR (400 MHz, CDCl<sub>3</sub>)  $\delta$ : 7.59-7.55 (m, 2H), 7.40-7.28 (m, 3H), 4.41 (br, 1H), 3.71 (d,  $J$  = 10.4 Hz, 3H), 3.58 (d,  $J$  = 10.0 Hz, 3H), 1.79 (d,  $J$  = 15.6 Hz, 3H); <sup>13</sup>C NMR (100 MHz, CDCl<sub>3</sub>)  $\delta$ :

141.2 (d,  $J = 0.8$  Hz), 128.3 (d,  $J = 2.0$  Hz), 127.1 (d,  $J = 2.6$  Hz), 125.4 (d,  $J = 4.1$  Hz), 73.5 (d,  $J = 159.7$  Hz), 54.3 (d,  $J = 7.3$  Hz), 53.4 (d,  $J = 7.4$  Hz), 26.2 (d,  $J = 3.2$  Hz);  $^{31}\text{P}$  NMR (161 MHz,  $\text{CDCl}_3$ )  $\delta$ : 26.21; IR (neat  $\text{cm}^{-1}$ ): 3251, 3031, 2921, 1226, 1021, 990, 766; LRMS (EI 70 ev)  $m/z$  (%): 230 ( $\text{M}^+$ , 100); HRMS  $m/z$  (ESI) calcd for  $\text{C}_{10}\text{H}_{16}\text{O}_4\text{P}$  ( $\text{M}+\text{H}$ ) $^+$  231.0787, found 231.0784.

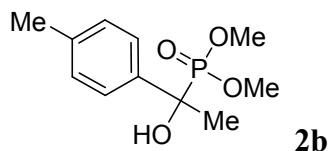

### Dimethyl 1-hydroxy-1-p-tolyethylphosphonate (2b): <sup>2</sup>

$^1\text{H}$  NMR (400 MHz,  $\text{CDCl}_3$ )  $\delta$ : 7.48 (dd,  $J = 8.0$  Hz,  $J = 2.0$  Hz, 2H), 7.19 (d,  $J = 8.0$  Hz, 2H), 4.46 (br, 1H), 3.77 (d,  $J = 10.0$  Hz, 3H), 3.63 (d,  $J = 10.0$  Hz, 3H), 2.32 (d,  $J = 1.2$  Hz, 3H), 1.83 (d,  $J = 15.2$  Hz, 3H);  $^{13}\text{C}$  NMR (100 MHz,  $\text{CDCl}_3$ )  $\delta$ : 138.3 (d,  $J = 8.0$  Hz), 136.4, 128.1, 125.2 (d,  $J = 4.2$  Hz), 73.3 (d,  $J = 163.4$  Hz), 54.1 (d,  $J = 7.7$  Hz), 53.5 (d,  $J = 7.7$  Hz), 25.7 (d,  $J = 3.3$  Hz), 21.0; IR (neat  $\text{cm}^{-1}$ ): 3269, 2937, 1447, 1221, 1020, 941;  $^{31}\text{P}$  NMR (161 MHz,  $\text{CDCl}_3$ )  $\delta$ : 26.64; LRMS (EI 70 ev)  $m/z$  (%): 244 ( $\text{M}^+$ , 100); HRMS  $m/z$  (ESI) calcd for  $\text{C}_{11}\text{H}_{18}\text{O}_4\text{P}$  ( $\text{M}+\text{H}$ ) $^+$  245.0943, found 245.0939.

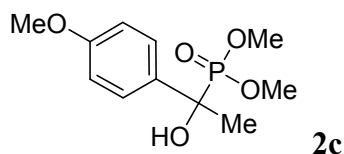

### Dimethyl 1-hydroxy-1-(4-methoxyphenyl)ethylphosphonate (2c): <sup>2</sup>

$^1\text{H}$  NMR (400 MHz,  $\text{CDCl}_3$ )  $\delta$ : 7.43 (dd,  $J = 2.0$  Hz,  $J = 8.0$  Hz, 2H), 6.83 (d,  $J = 8.8$  Hz, 2H), 3.81 (s, 3H), 3.69 (d,  $J = 10.0$  Hz, 3H), 3.57 (d,  $J = 10.0$  Hz, 3H), 1.76 (d,  $J = 15.6$  Hz, 3H);  $^{13}\text{C}$  NMR (100 MHz,  $\text{CDCl}_3$ )  $\delta$ : 159.2 (d,  $J = 2.5$  Hz), 132.1, 127.4 (d,  $J = 4.3$  Hz), 113.4 (d,  $J = 2.0$  Hz), 73.2 (d,  $J = 159.2$  Hz), 55.4, 54.4 (d,  $J = 7.3$  Hz), 53.2 (d,  $J = 7.3$  Hz), 25.5 (d,  $J = 4.1$  Hz);  $^{31}\text{P}$  NMR (161 MHz,  $\text{CDCl}_3$ )  $\delta$ : 26.51; LRMS (EI 70 ev)  $m/z$  (%): 260 ( $\text{M}^+$ , 100); HRMS  $m/z$  (ESI) calcd for  $\text{C}_{11}\text{H}_{18}\text{O}_5\text{P}$  ( $\text{M}+\text{H}$ ) $^+$  261.0893, found 261.0890.

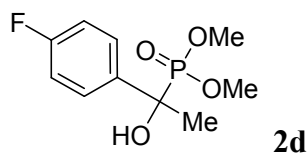

### Dimethyl 1-(4-fluorophenyl)-1-hydroxyethylphosphonate (2d): <sup>2</sup>

$^1\text{H}$  NMR (400 MHz,  $\text{CDCl}_3$ )  $\delta$ : 7.60-7.53 (m, 2H), 7.04 (t,  $J = 10.0$  Hz, 2H), 4.47 (br, 1H), 3.77 (d,  $J = 10.4$  Hz, 3H), 3.64 (d,  $J = 10.4$  Hz, 3H), 1.83 (d,  $J = 7.6$  Hz, 3H);  $^{13}\text{C}$  NMR (100 MHz,  $\text{CDCl}_3$ )  $\delta$ : 161.6, 159.8, 159.1, 137.18, 137.15, 137.13, 137.12, 127.4, 127.39, 127.37, 127.32, 114.3, 114.1, 114.05, 114.03, 73.9 (d,  $J = 159.8$  Hz), 54.7 (d,  $J = 7.6$  Hz), 53.6 (d,  $J = 7.4$  Hz), 26.1 (d,  $J = 4.4$  Hz);

$^{31}\text{P}$  NMR (161 MHz,  $\text{CDCl}_3$ )  $\delta$ : 25.76; LRMS (EI 70 ev)  $m/z$  (%): 248 ( $\text{M}^+$ , 100); HRMS  $m/z$  (ESI) calcd for  $\text{C}_{10}\text{H}_{15}\text{FO}_4\text{P}$  ( $\text{M}+\text{H}$ ) $^+$  249.0693, found 249.0699.

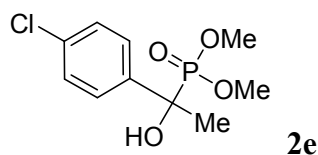

**Dimethyl 1-(4-chlorophenyl)-1-hydroxyethylphosphonate (2e):** <sup>2</sup>

$^1\text{H}$  NMR (400 MHz,  $\text{CDCl}_3$ )  $\delta$ : 7.44 (dd,  $J = 2.0$  Hz,  $J = 8.4$  Hz, 2H), 7.23 (d,  $J = 8.4$  Hz, 2H), 4.49 (br, 1H), 3.69 (d,  $J = 10.0$  Hz, 3H), 3.58 (d,  $J = 10.0$  Hz, 3H), 1.71 (d,  $J = 15.6$  Hz, 3H);  $^{13}\text{C}$  NMR (100 MHz,  $\text{CDCl}_3$ )  $\delta$ : 139.1, 133.0 (d,  $J = 3.1$  Hz), 128.6 (d,  $J = 2.2$  Hz), 127.9 (d,  $J = 4.0$  Hz), 73.1 (d,  $J = 159.5$  Hz), 54.7 (d,  $J = 7.8$  Hz), 53.5 (d,  $J = 7.6$  Hz), 25.7 (d,  $J = 7.8$  Hz);  $^{31}\text{P}$  NMR (161 MHz,  $\text{CDCl}_3$ )  $\delta$ : 25.80; LRMS (EI 70 ev)  $m/z$  (%): 264 ( $\text{M}^+$ , 78); HRMS  $m/z$  (ESI) calcd for  $\text{C}_{10}\text{H}_{15}\text{ClO}_4\text{P}$  ( $\text{M}+\text{H}$ ) $^+$  265.0397, found 265.0399.

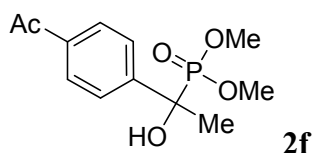

**Dimethyl 1-(4-acetylphenyl)-1-hydroxyethylphosphonate (2f):**

$^1\text{H}$  NMR (400 MHz,  $\text{CDCl}_3$ )  $\delta$ : 7.97 (dd,  $J = 7.2$  Hz,  $J = 1.2$  Hz, 2H), 7.29 (d,  $J = 7.2$  Hz, 2H), 4.47 (br, 1H), 3.73 (s, 3H), 3.69 (s, 3H), 2.61 (s, 3H), 1.78 (d,  $J = 15.2$  Hz, 3H);  $^{13}\text{C}$  NMR (100 MHz,  $\text{CDCl}_3$ )  $\delta$ : 198.7, 138.0 (d,  $J = 4.4$  Hz), 133.4 (d,  $J = 2.4$  Hz), 129.0 (d,  $J = 2.6$  Hz), 128.6 (d,  $J = 3.7$  Hz), 73.6 (d,  $J = 157.3$  Hz), 54.5 (d,  $J = 7.1$  Hz), 53.5 (d,  $J = 7.2$  Hz), 26.3, 24.6 (d,  $J = 3.3$  Hz).  $^{31}\text{P}$  NMR (161 MHz,  $\text{CDCl}_3$ )  $\delta$ : 24.59; IR (neat  $\text{cm}^{-1}$ ): 3262, 2963, 1657, 1604, 1221, 1063, 1027, 979; LRMS (EI 70 ev)  $m/z$  (%): 272 ( $\text{M}^+$ , 100); HRMS  $m/z$  (ESI) calcd for  $\text{C}_{12}\text{H}_{18}\text{O}_5\text{P}$  ( $\text{M}+\text{H}$ ) $^+$  273.0893, found 273.0891.

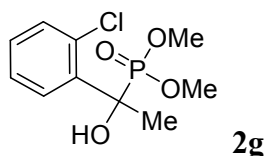

**Dimethyl 1-(2-chlorophenyl)-1-hydroxyethylphosphonate (2g):** <sup>2</sup>

$^1\text{H}$  NMR (400 MHz,  $\text{CDCl}_3$ )  $\delta$ : 7.66-7.62 (m, 1H), 7.24 (dd,  $J = 1.2$  Hz,  $J = 7.6$  Hz, 1H), 7.19-7.14 (m, 2H), 4.46 (br, 1H), 3.68 (d,  $J = 10.4$  Hz, 6H), 1.88 (d,  $J = 15.2$  Hz, 3H);  $^{13}\text{C}$  NMR (100 MHz,  $\text{CDCl}_3$ )  $\delta$ : 137.1 (d,  $J = 3.1$  Hz), 131.8 (d,  $J = 5.3$  Hz), 131.0 (d,  $J = 1.9$  Hz), 129.4 (d,  $J = 3.5$  Hz), 128.6 (d,  $J = 2.6$  Hz), 126.3 (d,  $J = 1.7$  Hz), 74.7 (d,  $J = 158.7$  Hz), 54.4 (d,  $J = 7.0$  Hz), 53.5 (d,  $J = 6.8$  Hz), 25.3;  $^{31}\text{P}$  NMR (161 MHz,  $\text{CDCl}_3$ )  $\delta$ : 25.31; LRMS (EI 70 ev)  $m/z$  (%): 264 ( $\text{M}^+$ , 86); HRMS  $m/z$

(ESI) calcd for C<sub>10</sub>H<sub>15</sub>ClO<sub>4</sub>P (M+H)<sup>+</sup> 265.0397, found 265.0400.

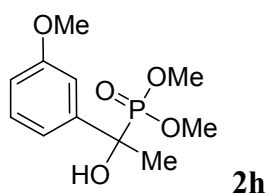

Dimethyl 1-hydroxy-1-(3-methoxyphenyl)ethylphosphonate (**2h**):<sup>3</sup>

<sup>1</sup>H NMR (400 MHz, CDCl<sub>3</sub>)  $\delta$ : 7.31-7.28 (m, 1H), 7.23-7.19 (m, 2H), 6.88-6.85 (m, 1H), 4.44 (br, 1H), 3.87 (s, 3H), 3.79 (d,  $J = 10.4$  Hz, 3H), 3.66 (d,  $J = 10.4$  Hz, 3H), 1.81 (d,  $J = 15.2$  Hz, 3H); <sup>13</sup>C NMR (100 MHz, CDCl<sub>3</sub>)  $\delta$ : 159.1 (d,  $J = 2.0$  Hz), 142.3 (d,  $J = 1.2$  Hz), 129.1 (d,  $J = 2.6$  Hz), 118.7 (d,  $J = 4.6$  Hz), 113.2 (d,  $J = 2.8$  Hz), 110.9 (d,  $J = 4.3$  Hz), 73.5 (d,  $J = 158.2$  Hz), 55.7, 54.3 (d,  $J = 7.7$  Hz), 53.2 (d,  $J = 7.7$  Hz), 25.1 (d,  $J = 3.5$  Hz); IR (neat cm<sup>-1</sup>): 3291, 2921, 1441, 1231, 1129, 1044, 789; <sup>31</sup>P NMR (161 MHz, CDCl<sub>3</sub>)  $\delta$ : 25.99; LRMS (EI 70 ev)  $m/z$  (%): 260 (M<sup>+</sup>, 100); HRMS  $m/z$  (ESI) calcd for C<sub>11</sub>H<sub>18</sub>O<sub>5</sub>P (M+H)<sup>+</sup> 261.0893, found 261.0898.

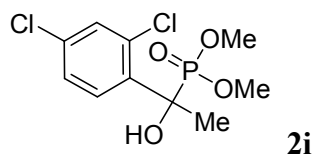

Dimethyl 1-(2,4-dichlorophenyl)-1-hydroxyethylphosphonate (**2i**):<sup>4</sup>

<sup>1</sup>H NMR (400 MHz, CDCl<sub>3</sub>)  $\delta$ : 7.81 (d,  $J = 7.2$  Hz, 1H), 7.49 (d,  $J = 8.8$  Hz, 1H), 7.40 (d,  $J = 6.4$  Hz, 1H), 4.475 (br, 1H), 3.69 (d,  $J = 10.4$  Hz, 3H), 3.57 (d,  $J = 10.8$  Hz, 3H), 1.85 (d,  $J = 15.6$  Hz, 3H); <sup>13</sup>C NMR (100 MHz, CDCl<sub>3</sub>)  $\delta$ : 139.3 (d,  $J = 4.4$  Hz), 133.4 (d,  $J = 3.9$  Hz), 132.5 (d,  $J = 2.0$  Hz), 131.8 (d,  $J = 5.8$  Hz), 129.9 (d,  $J = 3.1$  Hz), 127.1 (d,  $J = 2.6$  Hz), 73.4 (d,  $J = 161.9$  Hz), 54.4 (d,  $J = 7.1$  Hz), 53.6 (d,  $J = 7.4$  Hz), 24.8 (d,  $J = 3.3$  Hz); <sup>31</sup>P NMR (161 MHz, CDCl<sub>3</sub>)  $\delta$ : 25.33; LRMS (EI 70 ev)  $m/z$  (%): 298 (M<sup>+</sup>, 31); IR (neat cm<sup>-1</sup>): 3277, 2966, 1441, 1227, 1033, 853, 790; HRMS  $m/z$  (ESI) calcd for C<sub>10</sub>H<sub>14</sub>Cl<sub>2</sub>O<sub>4</sub>P (M+H)<sup>+</sup> 299.0007, found 299.0011.

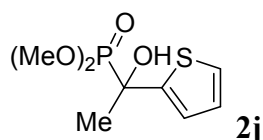

Dimethyl 1-hydroxy-1-(thiophen-2-yl)ethylphosphonate (**2j**):<sup>4</sup>

<sup>1</sup>H NMR (400 MHz, CDCl<sub>3</sub>)  $\delta$ : 7.31-7.27 (m, 1H), 7.12-7.08 (m, 1H), 6.95-6.92 (m, 1H), 4.51 (br, 1H), 3.66 (d,  $J = 10.4$  Hz, 3H), 3.58 (d,  $J = 10.4$  Hz, 3H), 1.74 (d,  $J = 15.2$  Hz, 3H); <sup>13</sup>C NMR (100 MHz, CDCl<sub>3</sub>)  $\delta$ : 155.1, 142.3 (d,  $J = 10.1$  Hz), 111.0, 108, 71.1 (d,  $J = 162.9$  Hz), 54.3 (d,  $J = 7.5$  Hz), 53.1 (d,  $J = 7.1$  Hz), 23.1 (d,  $J = 2.8$  Hz); <sup>31</sup>P NMR (161 MHz, CDCl<sub>3</sub>)  $\delta$ : 24.67; LRMS (EI 70 ev)  $m/z$

(%): 236 ( $M^+$ , 100); HRMS  $m/z$  (ESI) calcd for  $C_8H_{14}O_4PS$  ( $M+H$ ) $^+$  237.0350, found 237.0354.

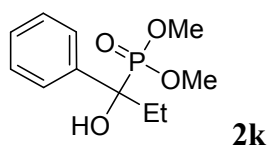

#### Dimethyl 1-hydroxy-1-phenylpropylphosphonate (**2k**): <sup>3</sup>

$^1H$  NMR (400 MHz,  $CDCl_3$ )  $\delta$ : 7.52-7.49 (m, 2H), 7.31 (t,  $J = 7.8$  Hz, 2H), 7.23-7.20 (m, 1H), 4.43 (br, 1H), 3.69 (d,  $J = 10.0$  Hz, 6H), 2.61-2.27 (m, 2H), 0.87 (t,  $J = 7.6$  Hz, 3H);  $^{13}C$  NMR (100 MHz,  $CDCl_3$ )  $\delta$ : 138.7, 127.8 (d,  $J = 3.0$  Hz), 127.0 (d,  $J = 3.3$  Hz), 125.8 (d,  $J = 4.3$  Hz), 75.7 (d,  $J = 158.6$  Hz), 54.6 (d,  $J = 7.5$  Hz), 53.1 (d,  $J = 7.3$  Hz), 29.6 (d,  $J = 4.3$  Hz), 9.1 (d,  $J = 8.9$  Hz);  $^{31}P$  NMR (161 MHz,  $CDCl_3$ )  $\delta$ : 25.29; LRMS (EI 70 ev)  $m/z$  (%): 244 ( $M^+$ , 100); HRMS  $m/z$  (ESI) calcd for  $C_{11}H_{18}O_4P$  ( $M+H$ ) $^+$  245.0943, found 245.0944.

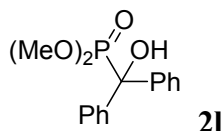

#### Dimethyl hydroxydiphenylmethylphosphonate (**2l**): <sup>4</sup>

$^1H$  NMR (400 MHz,  $CDCl_3$ )  $\delta$ : 7.56 (d,  $J = 7.6$  Hz, 4H), 7.37-7.31 (m, 4H), 7.23-7.20 (m, 2H), 4.51 (br, 1H), 3.71 (d,  $J = 10.4$  Hz, 6H);  $^{13}C$  NMR (100 MHz,  $CDCl_3$ )  $\delta$ : 141.4 (d,  $J = 1.4$  Hz), 127.7 (d,  $J = 2.3$  Hz), 127.0 (d,  $J = 3.1$  Hz), 126.5 (d,  $J = 4.2$  Hz), 75.8 (d,  $J = 254.6$  Hz), 54.8 (d,  $J = 7.0$  Hz), 53.4 (d,  $J = 7.8$  Hz);  $^{31}P$  NMR (161 MHz,  $CDCl_3$ )  $\delta$ : 23.53; LRMS (EI 70 ev)  $m/z$  (%): 292 ( $M^+$ , 100); HRMS  $m/z$  (ESI) calcd for  $C_{15}H_{18}O_4P$  ( $M+H$ ) $^+$  293.0944, found 293.0947.

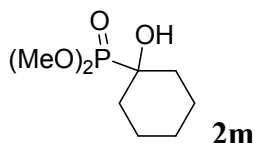

#### Dimethyl 1-hydroxycyclohexylphosphonate (**2m**): <sup>5</sup>

$^1H$  NMR (400 MHz,  $CDCl_3$ )  $\delta$ : 4.48 (br, 1H), 3.71 (s, 3H), 3.68 (s, 3H), 1.85 (t,  $J = 10.2$  Hz, 2H), 1.68-1.31 (m, 8H);  $^{13}C$  NMR (100 MHz,  $CDCl_3$ )  $\delta$ : 71.8 (d,  $J = 164.0$  Hz), 53.3 (d,  $J = 7.5$  Hz), 31.1 (d,  $J = 2.8$  Hz), 25.1, 19.7 (d,  $J = 11.3$  Hz);  $^{31}P$  NMR (161 MHz,  $CDCl_3$ )  $\delta$ : 26.43; LRMS (EI 70 ev)  $m/z$  (%): 208 ( $M^+$ , 100); HRMS  $m/z$  (ESI) calcd for  $C_8H_{18}O_4P$  ( $M+H$ ) $^+$  209.0945, found 209.0947.

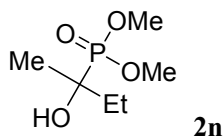

#### Dimethyl 2-hydroxybutan-2-ylphosphonate (**2n**): <sup>2</sup>

$^1\text{H}$  NMR (400 MHz,  $\text{CDCl}_3$ )  $\delta$ : 4.49 (br, 1H), 3.74 (s, 3H), 3.71 (s, 3H), 1.85-1.81 (m, 1H), 1.69-1.62 (m, 1H), 1.33 (d,  $J = 15.6$  Hz, 3H), 0.97 (t,  $J = 7.6$  Hz, 3H);  $^{13}\text{C}$  NMR (100 MHz,  $\text{CDCl}_3$ )  $\delta$ : 73.3 (d,  $J = 161.2$  Hz), 54.5 (d,  $J = 6.8$  Hz), 53.1 (d,  $J = 5.9$  Hz), 29.2 (d,  $J = 5.0$  Hz), 21.5 (d,  $J = 4.4$  Hz), 7.1 (d,  $J = 8.0$  Hz);  $^{31}\text{P}$  NMR (161 MHz,  $\text{CDCl}_3$ )  $\delta$ : 30.10; IR (neat  $\text{cm}^{-1}$ ): 3300, 2939, 1452, 1227, 1132, 1020; LRMS (EI 70 eV)  $m/z$  (%): 182 ( $\text{M}^+$ , 100); HRMS  $m/z$  (ESI) calcd for  $\text{C}_6\text{H}_{16}\text{O}_4\text{P}$  ( $\text{M}+\text{H}$ ) $^+$  183.0791, found 183.0797.

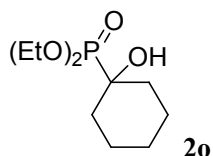

### Diethyl 1-hydroxycyclohexylphosphonate (2o): <sup>6</sup>

$^1\text{H}$  NMR (400 MHz,  $\text{CDCl}_3$ )  $\delta$ : 4.16-4.09 (m, 4H), 3.37 (br, 1H), 1.86 (t,  $J = 9.5$  Hz, 2H), 1.68-1.60 (m, 5H), 1.52-1.49 (m, 2H), 1.31-1.27 (m, 6H), 1.20-1.14 (m, 1H);  $^{13}\text{C}$  NMR (100 MHz,  $\text{CDCl}_3$ )  $\delta$ : 71.7 (d,  $J = 163.9$  Hz), 62.6 (d,  $J = 7.4$  Hz), 31.4, 25.2, 20.0 (d,  $J = 11.0$  Hz), 16.4 (d,  $J = 5.4$  Hz);  $^{31}\text{P}$  NMR (161 MHz,  $\text{CDCl}_3$ )  $\delta$ : 26.73; LRMS (EI 70 eV)  $m/z$  (%): 236 ( $\text{M}^+$ , 100); HRMS  $m/z$  (ESI) calcd for  $\text{C}_{10}\text{H}_{22}\text{O}_4\text{P}$  ( $\text{M}+\text{H}$ ) $^+$  237.1257, found 237.1261.

### (E) References

- (1) Rajeshwaran, G. G.; Nandakumar, M.; Sureshababu, R.; Mohanakrishnan, A. K. *Org. Lett.*, **2011**, *13*, 1270.
- (1) Seven, O.; Polat-Cakir, S.; Hossain, M. S.; Emrullahoglu, M.; Demir, A. S. *Tetrahedron*, **2011**, *67*, 3464.
- (2) Zhou, X.; Liu, Y.; Chang, L.; Zhao, J.; Shang, D.; Liu, X.; Lin, L.; Feng, X. *Adv. Synth. Catal.*; **2009**, *351* 2567.
- (3) Wang, C.; Zhou, J.; Lv, X.; Wen, J.; He, H. *Phosphorus, Sulfur, Silicon Relat. Elem.*, **2013**, *188*, 1334.
- (4) Azizi, N.; Saidi, M. R. *Phosphorus, Sulfur, Silicon Relat. Elem.*, **2003**, *178*, 1255.
- (5) Kolodiazhnyi, O. I.; Kolodiazhna, O. O. *Synth. Commun.*, **2012**, *42*, 1637.



(F) Spectra

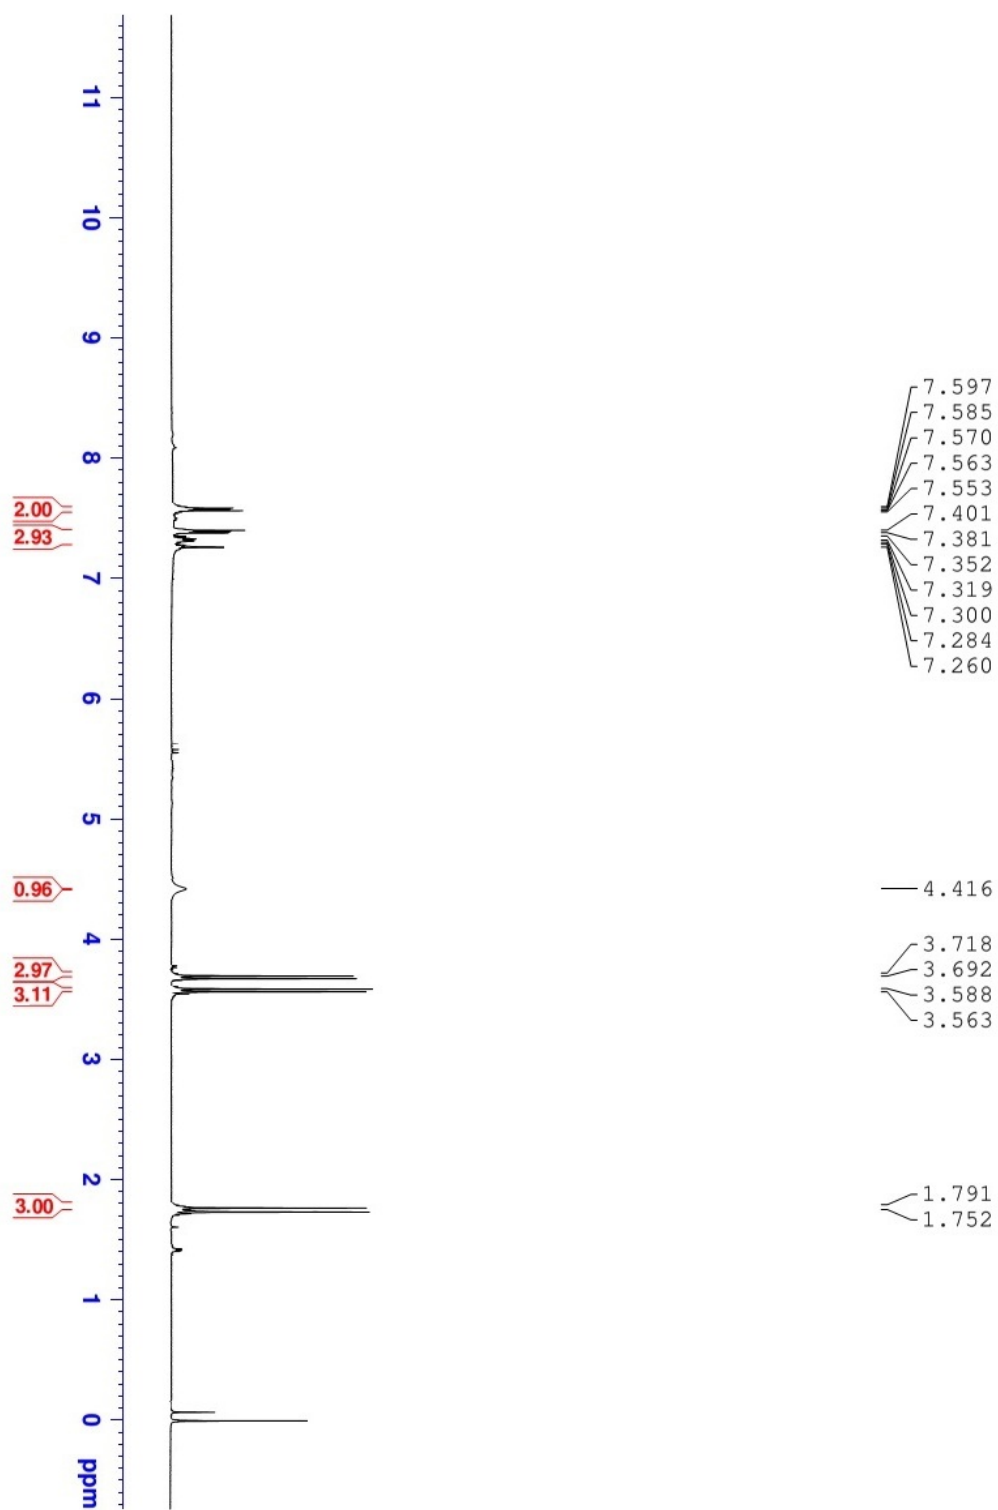

<sup>1</sup>H NMR of Compound 2a

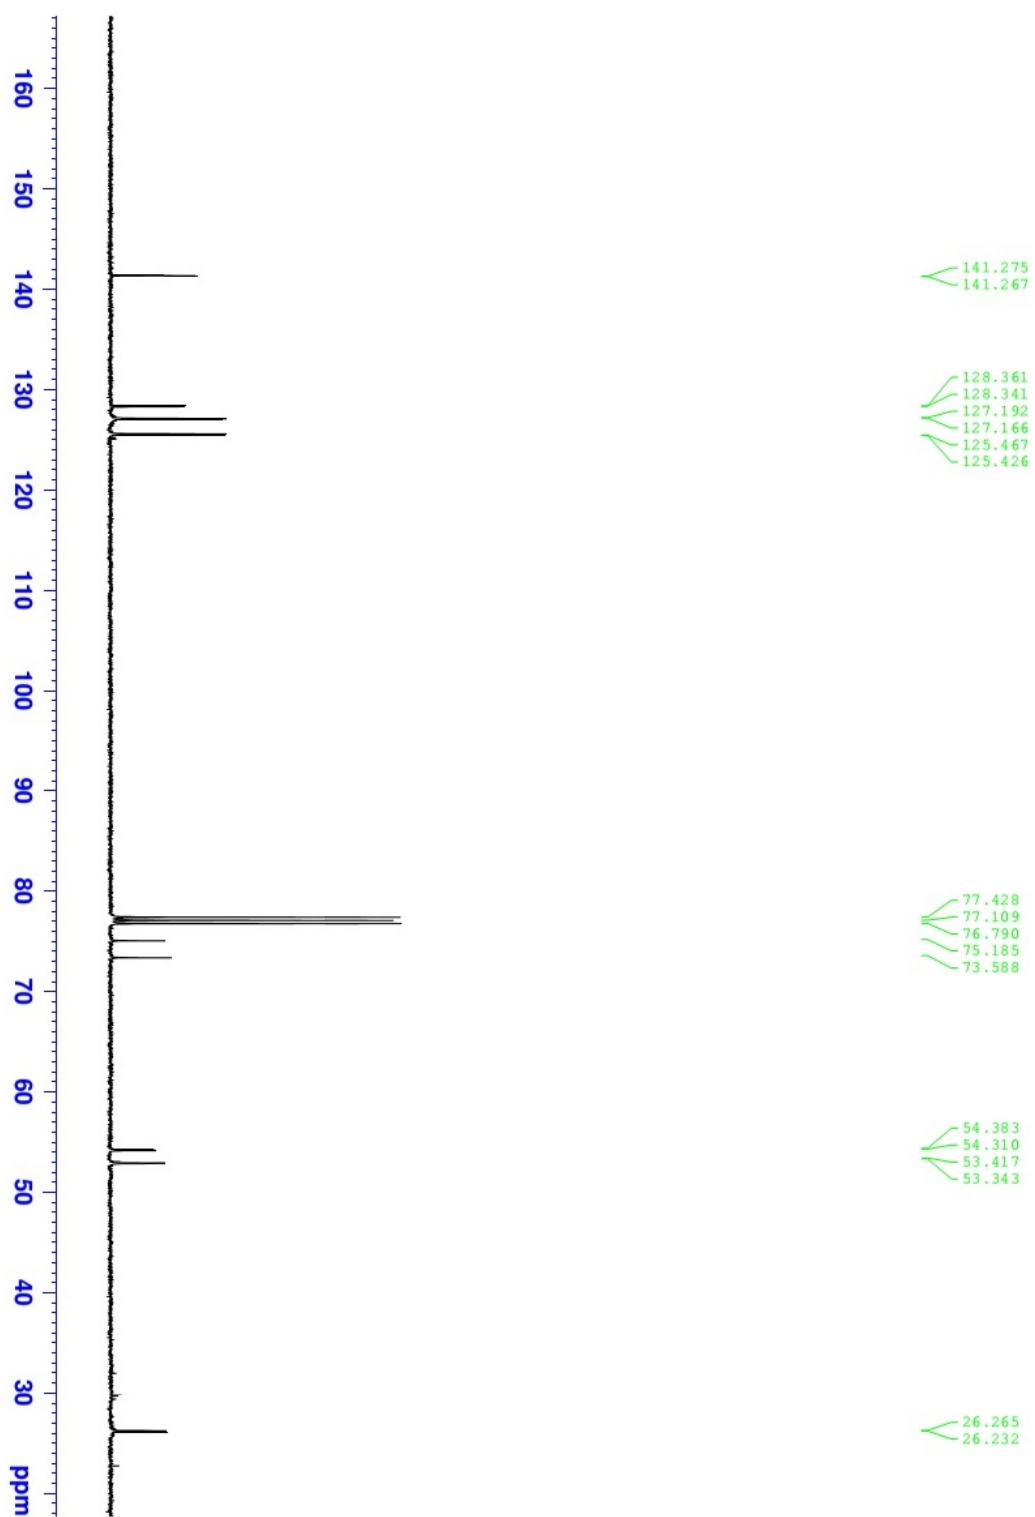

$^{13}\text{C}$  NMR of Compound 2a

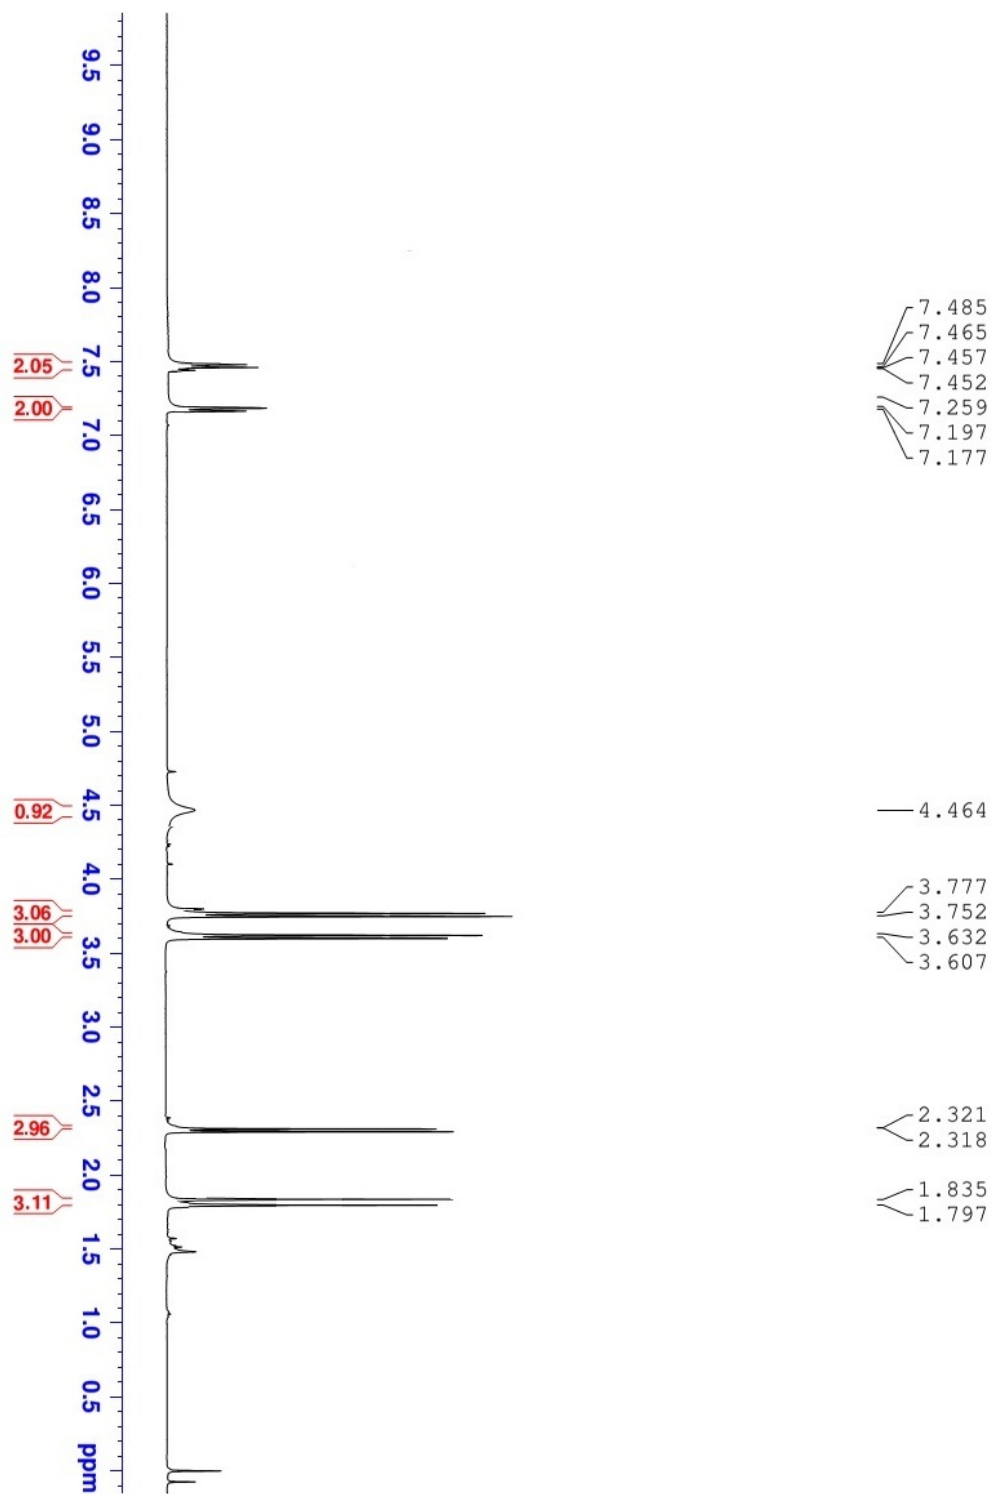

$^1\text{H}$  NMR of Compound 2b

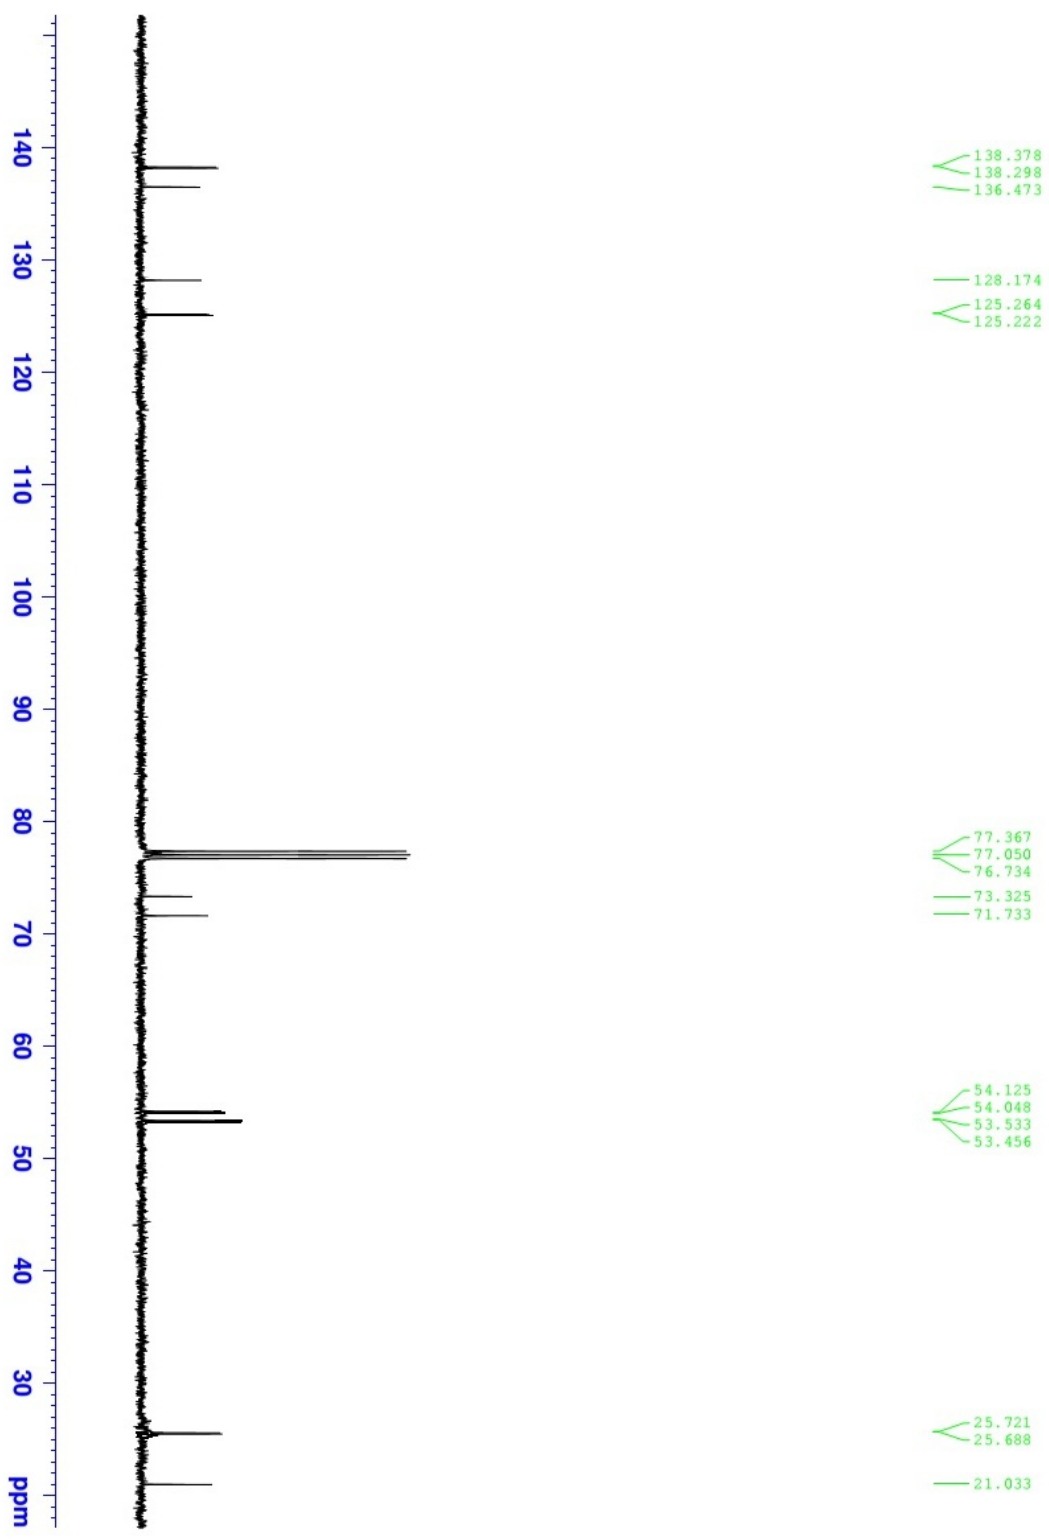

<sup>13</sup>C NMR of Compound 2b

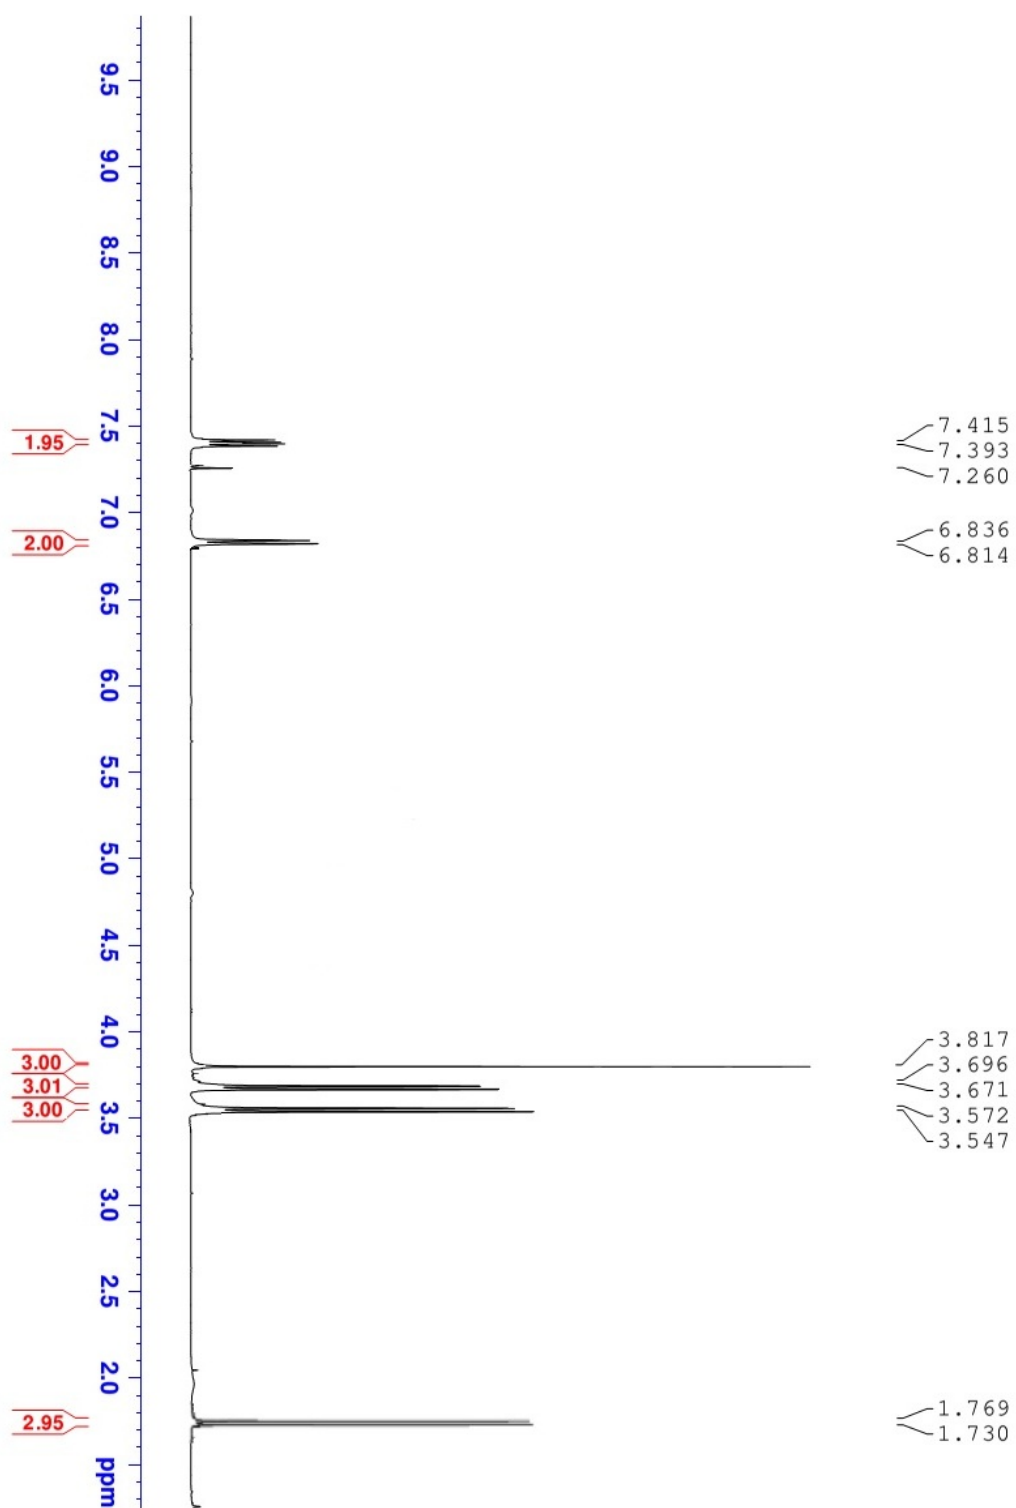

<sup>1</sup>H NMR of Compound 2c

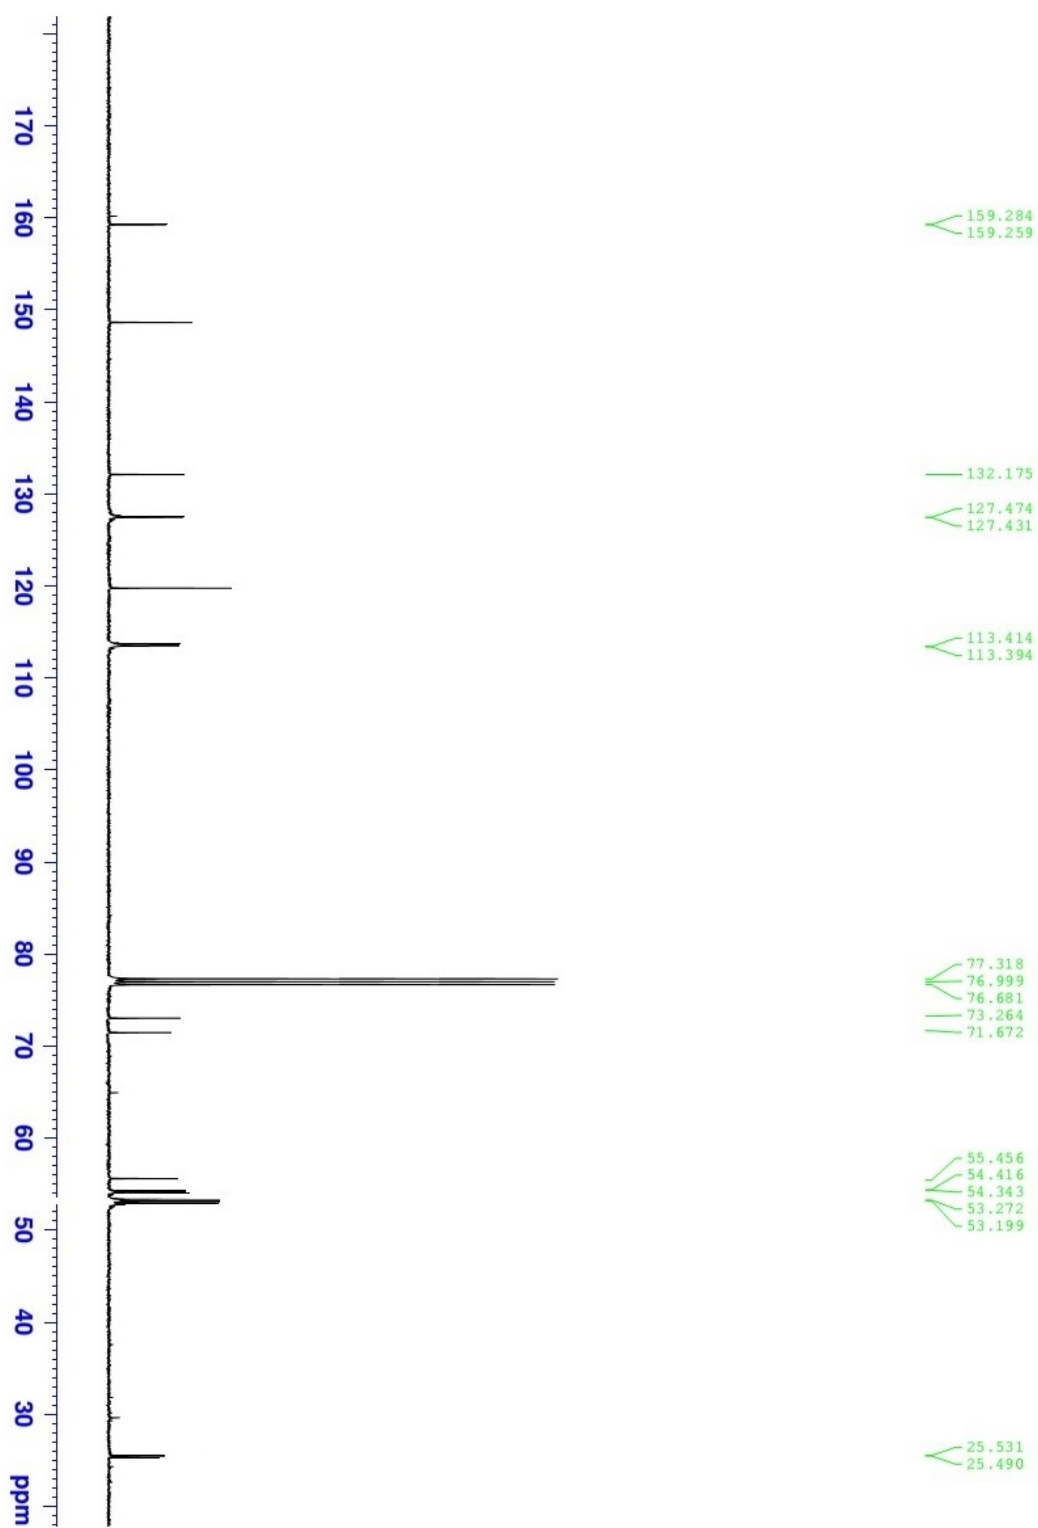

$^{13}\text{C}$  NMR of Compound 2c

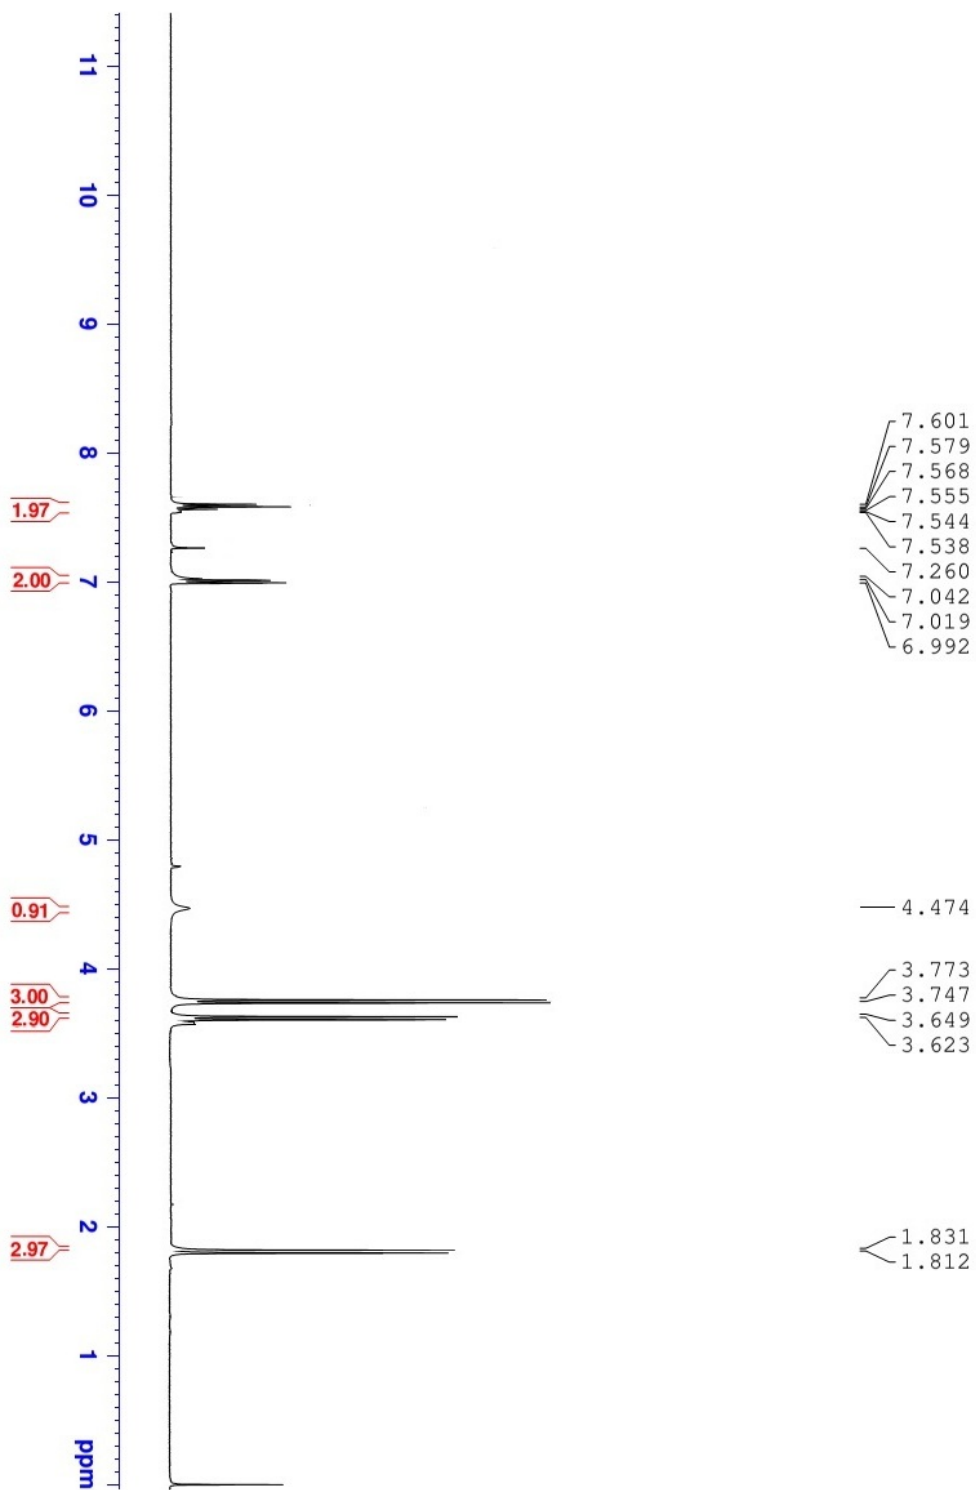

<sup>1</sup>H NMR of Compound 2d

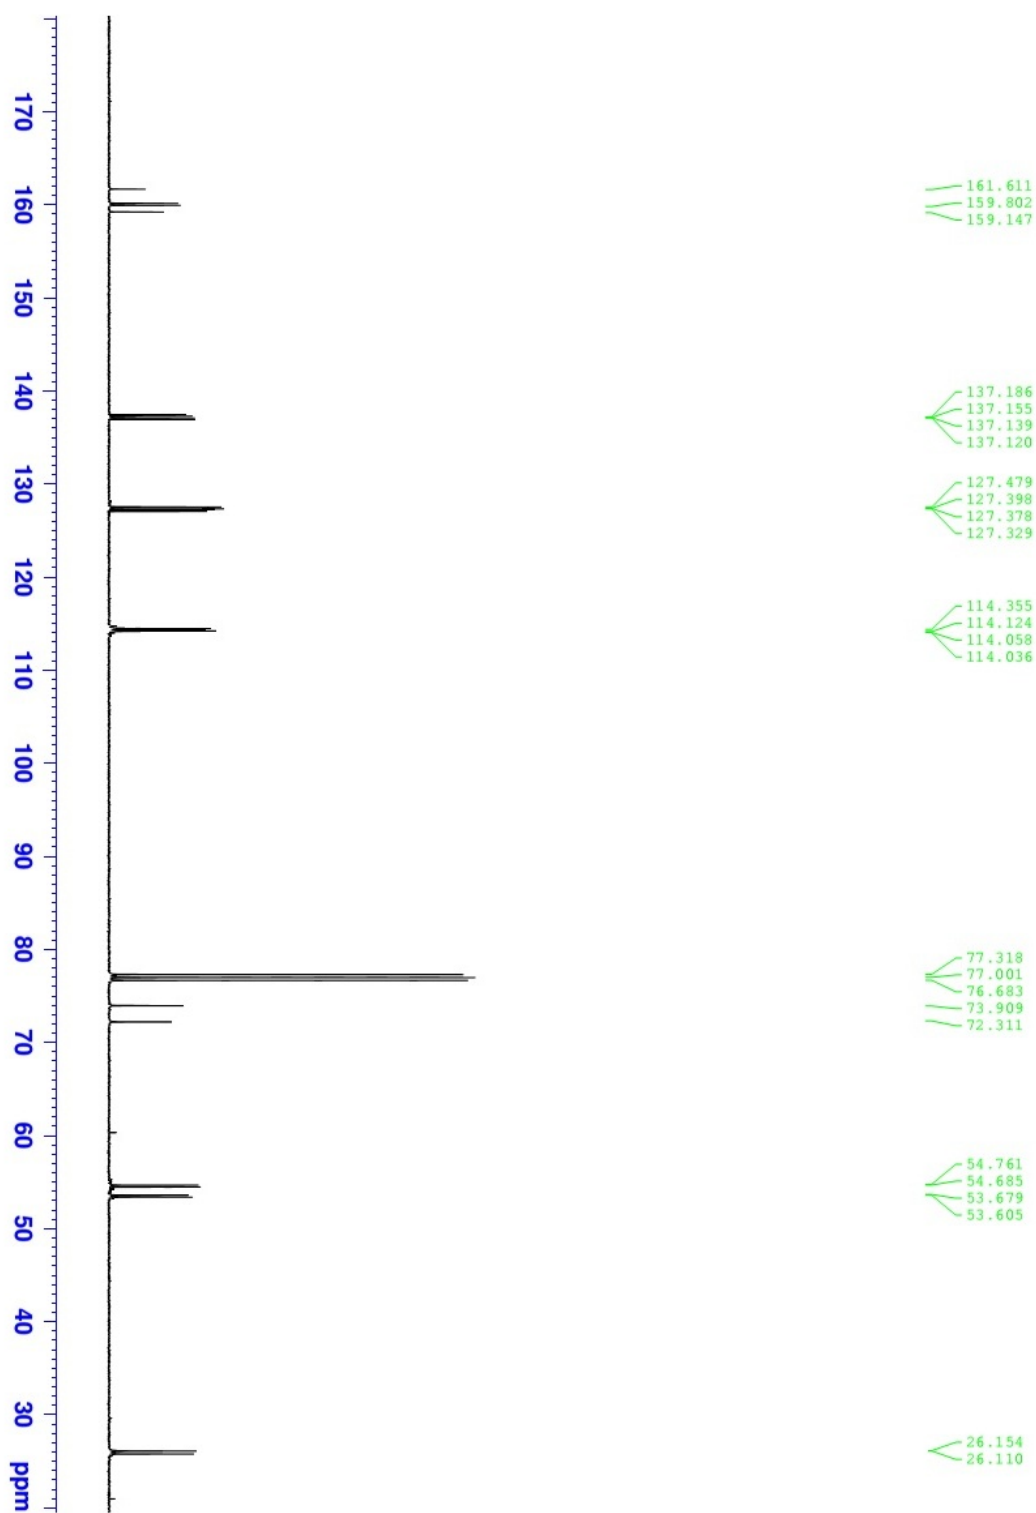

<sup>13</sup>C NMR of Compound 2d



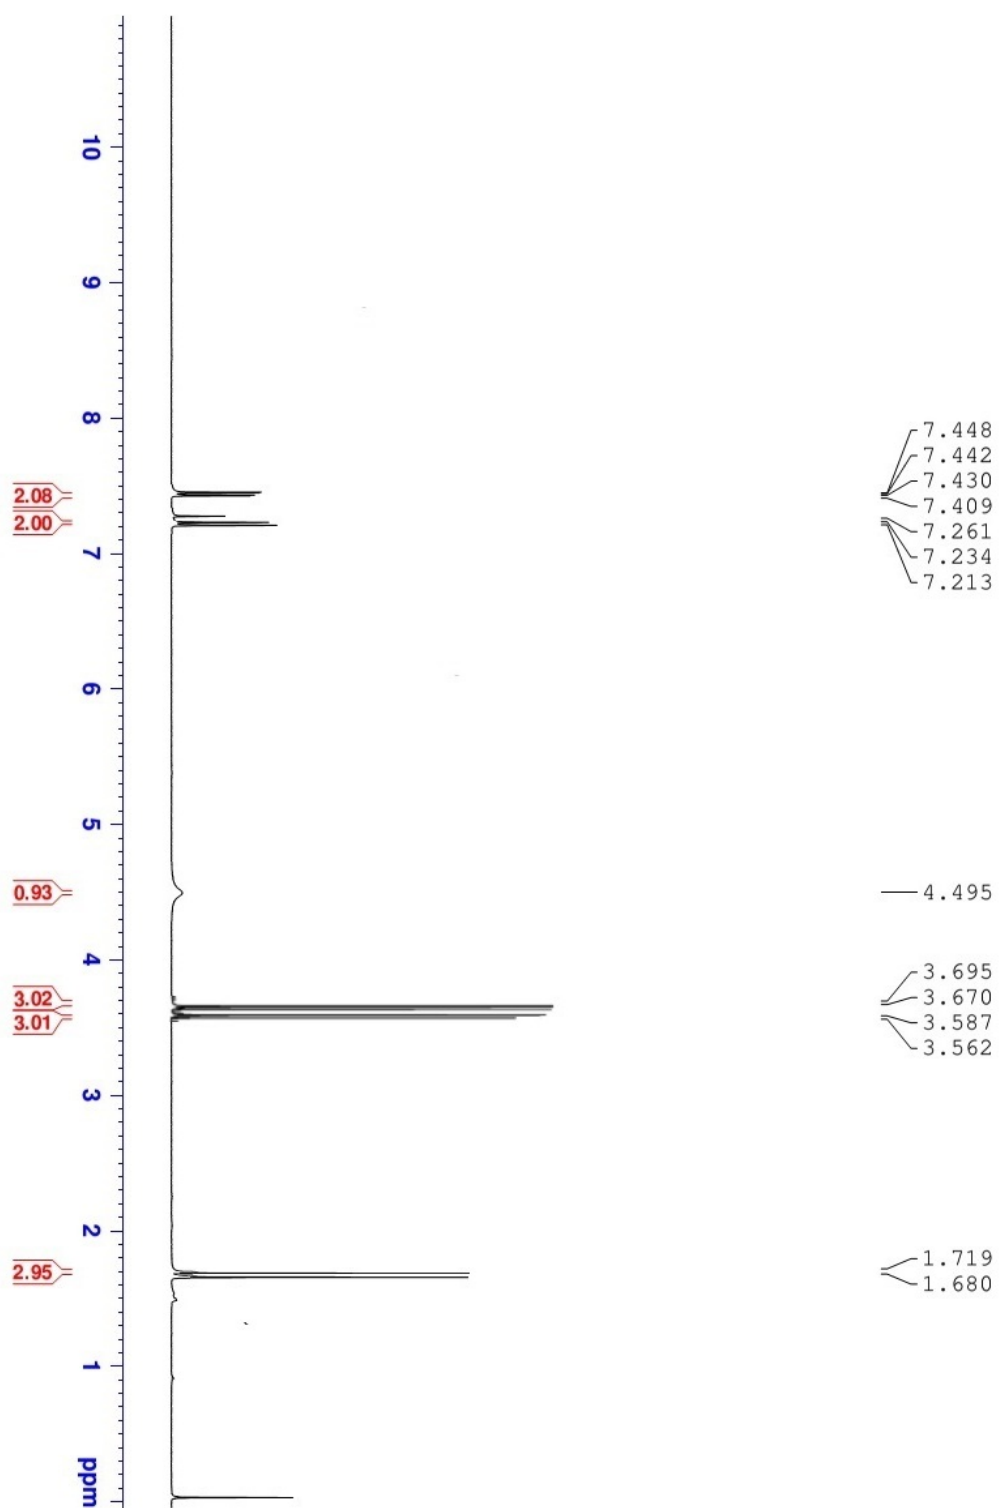

<sup>1</sup>H NMR of Compound 2e

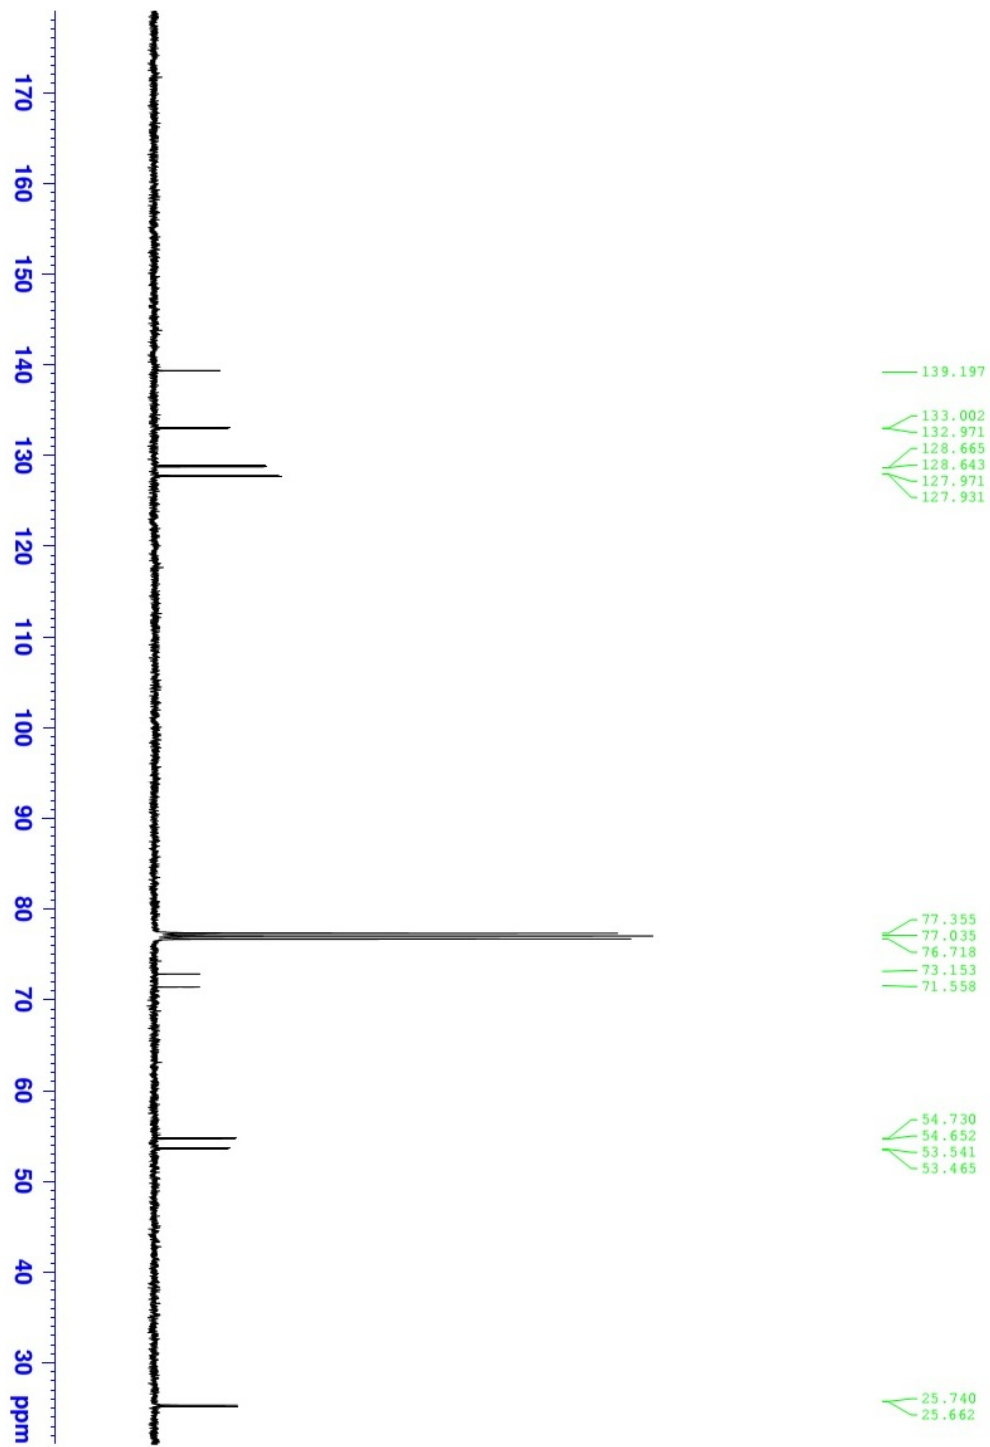

$^{13}\text{C}$  NMR of Compound 2e

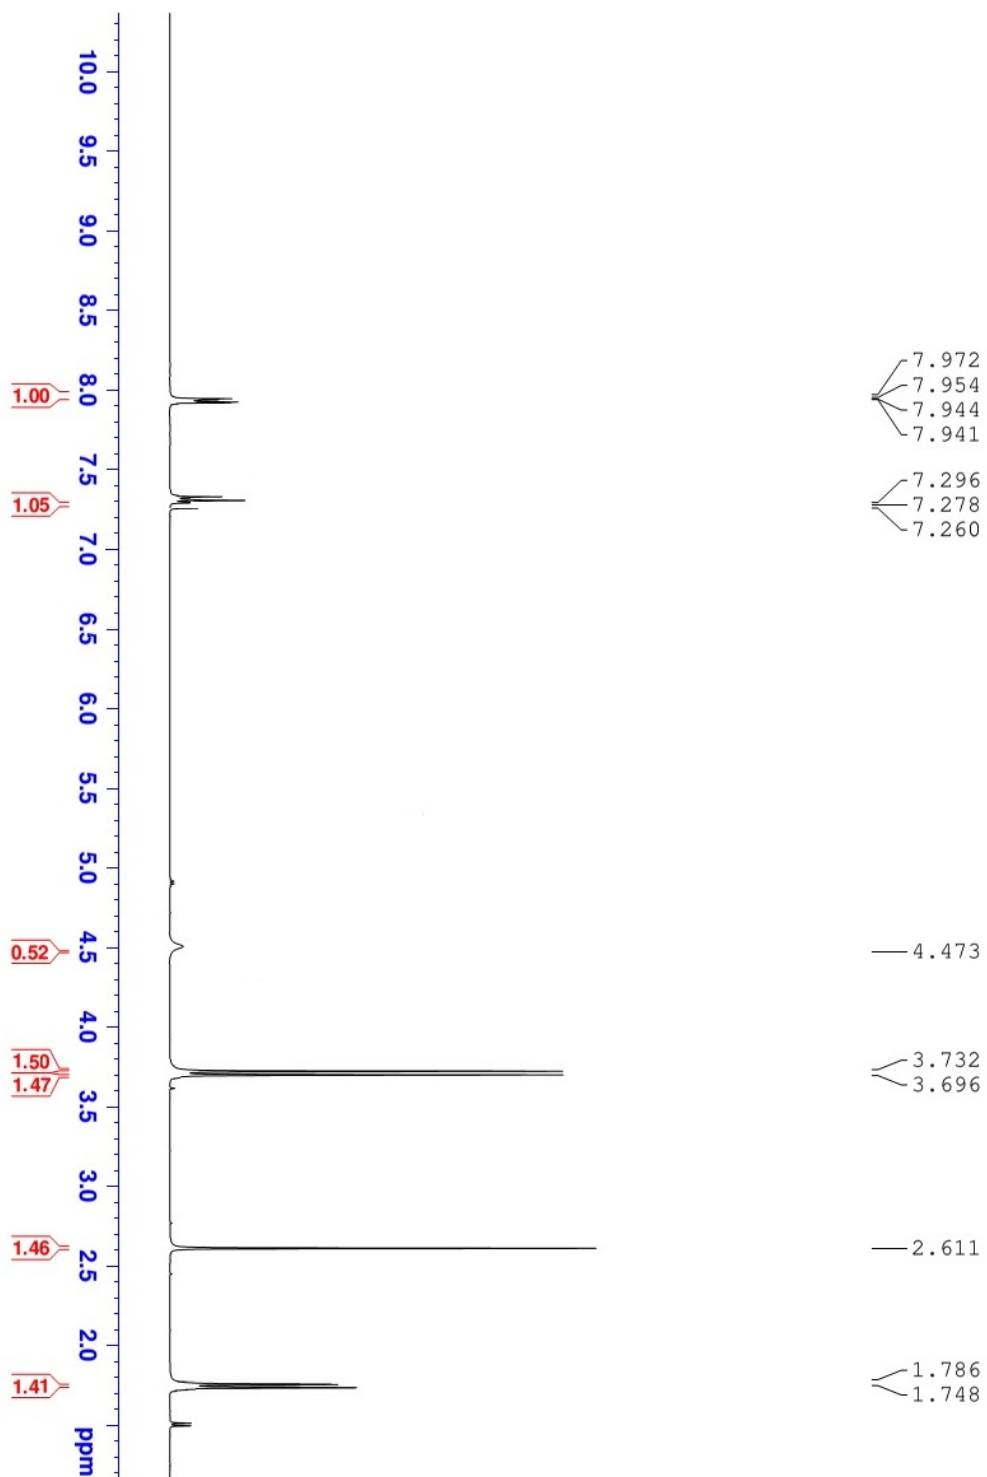

<sup>1</sup>H NMR of Compound 2f

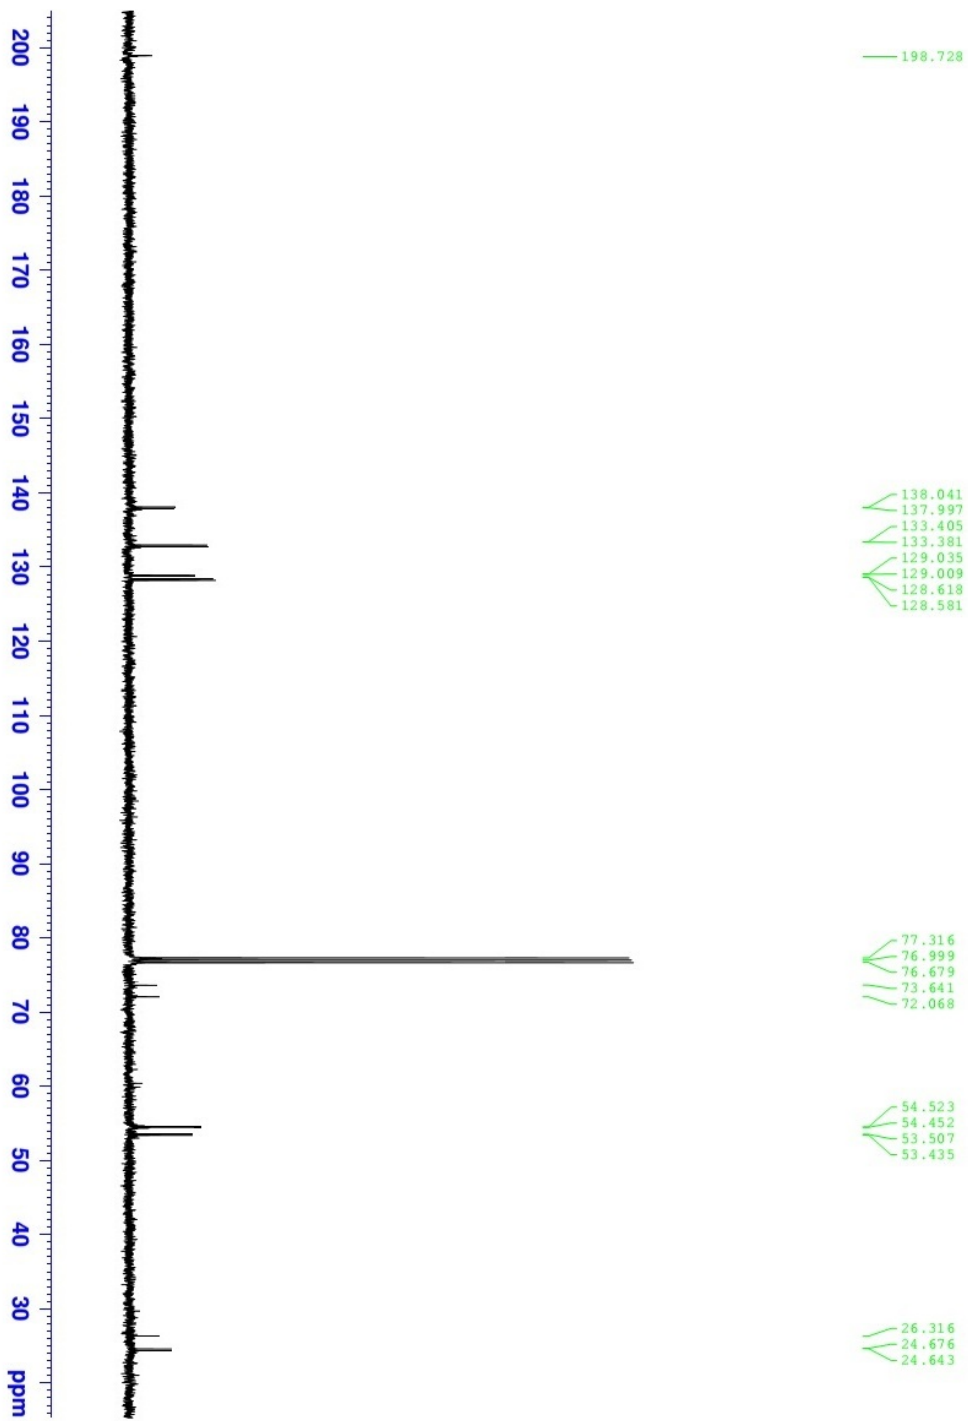

$^{13}\text{C}$  NMR of Compound 2f

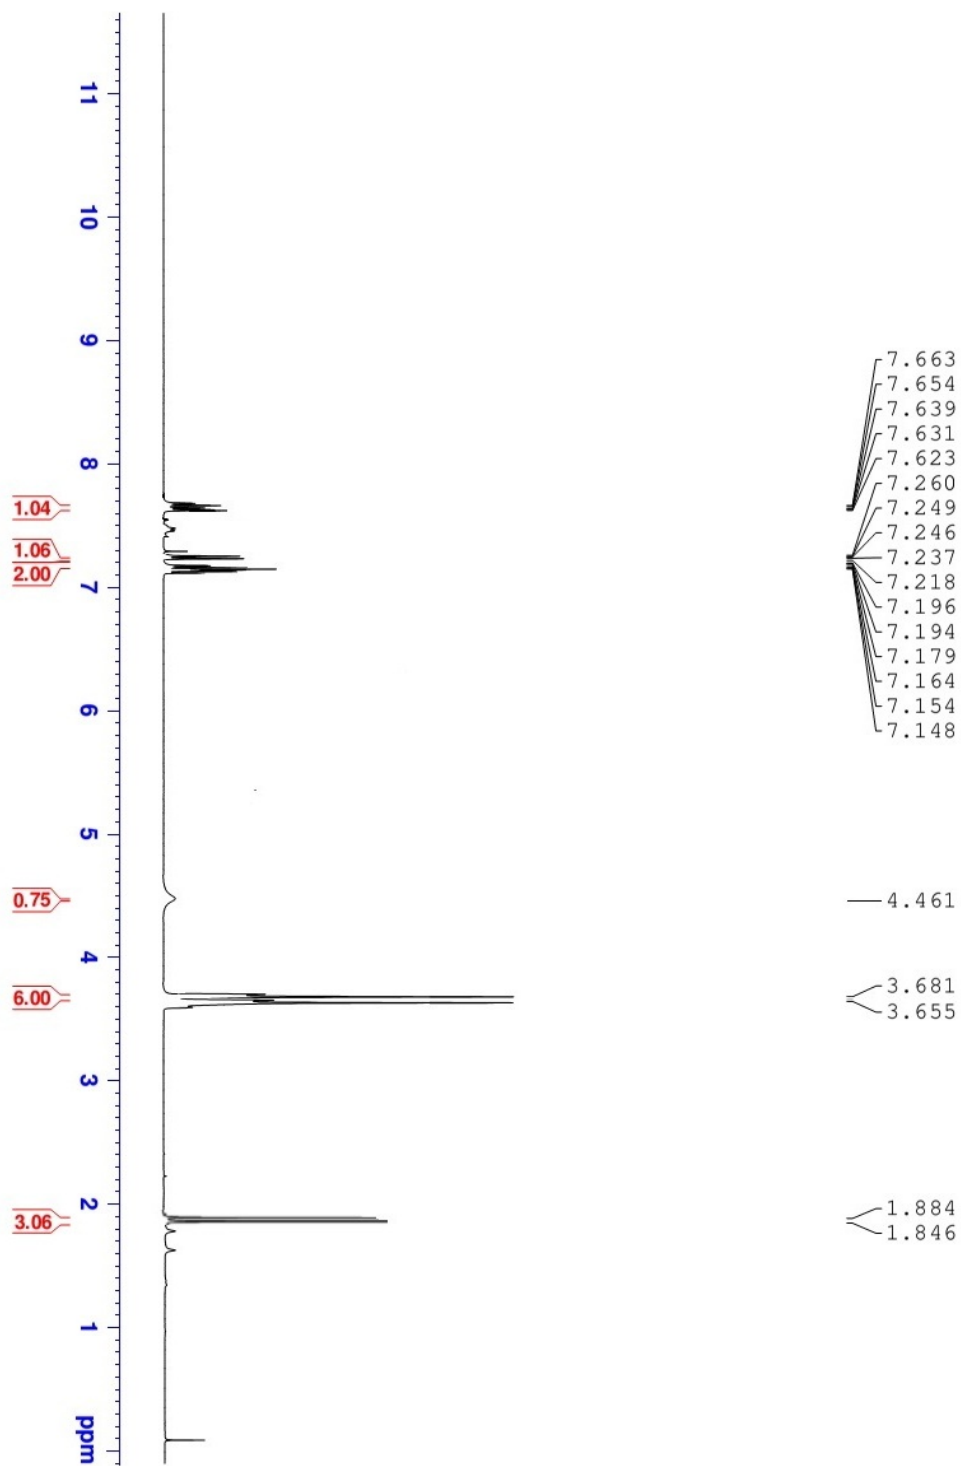

<sup>1</sup>H NMR of Compound 2g

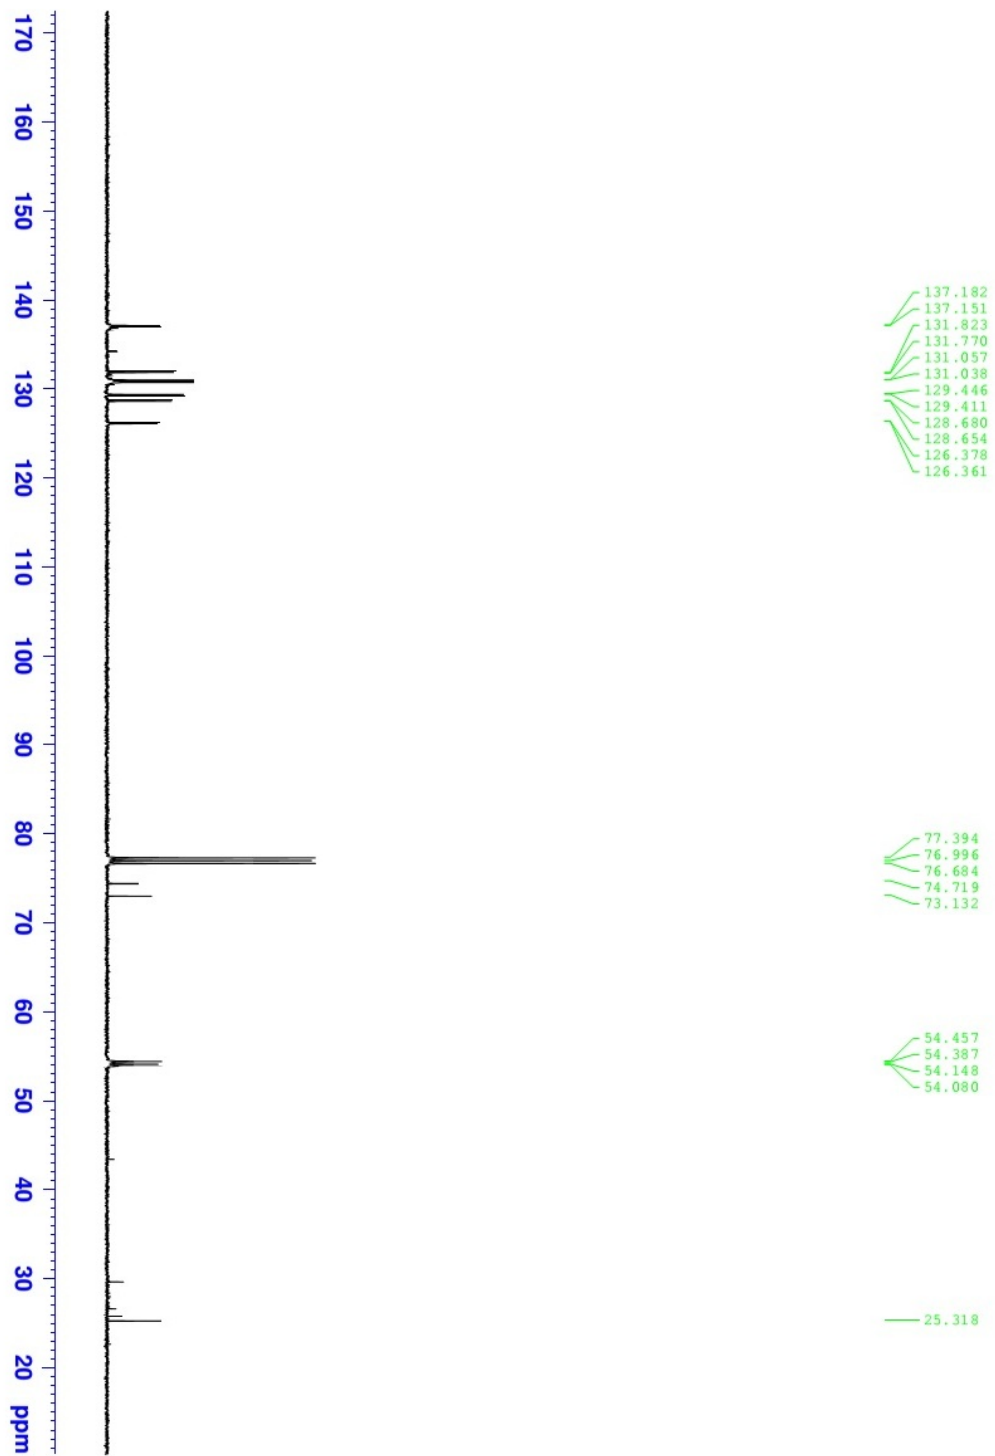

<sup>13</sup>C NMR of Compound 2g

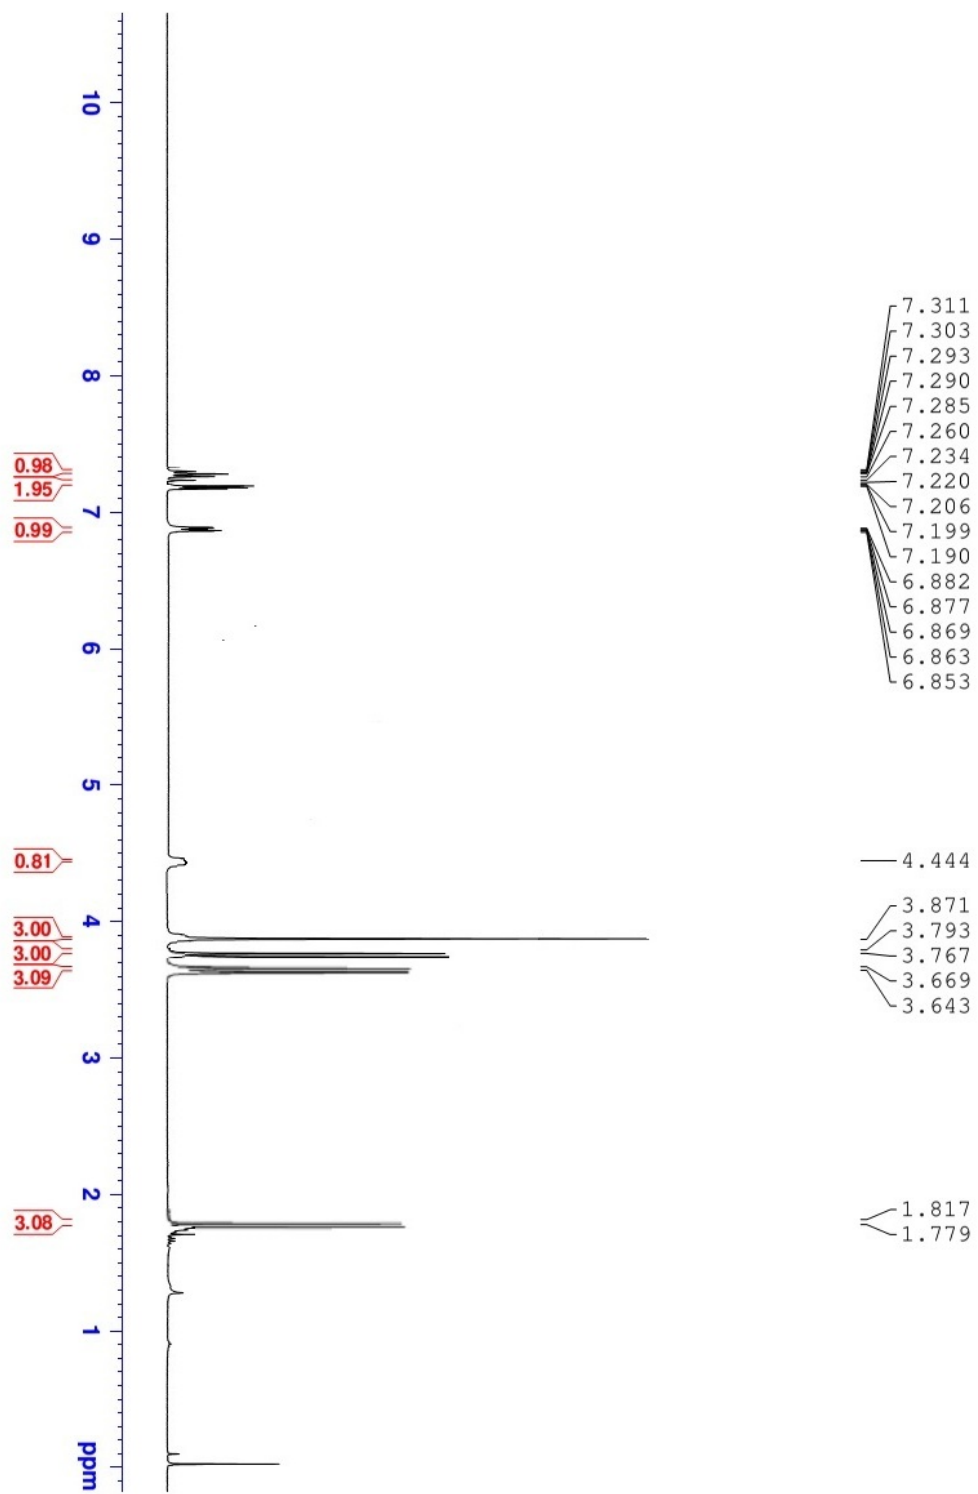

<sup>1</sup>H NMR of Compound 2h

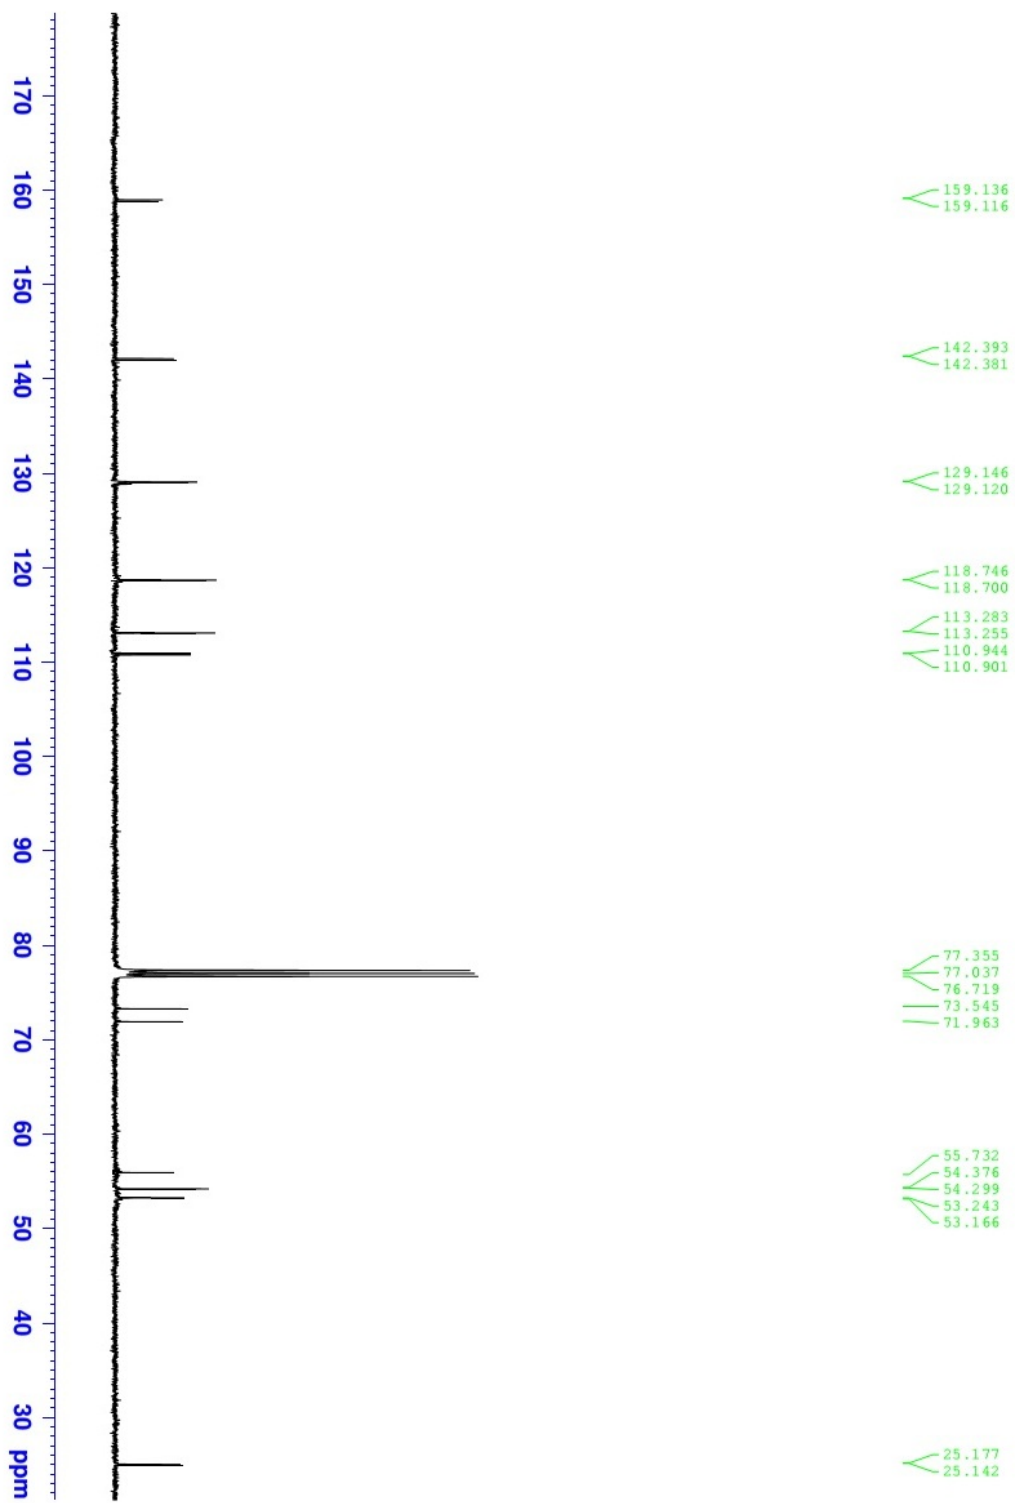

<sup>13</sup>C NMR of Compound 2h



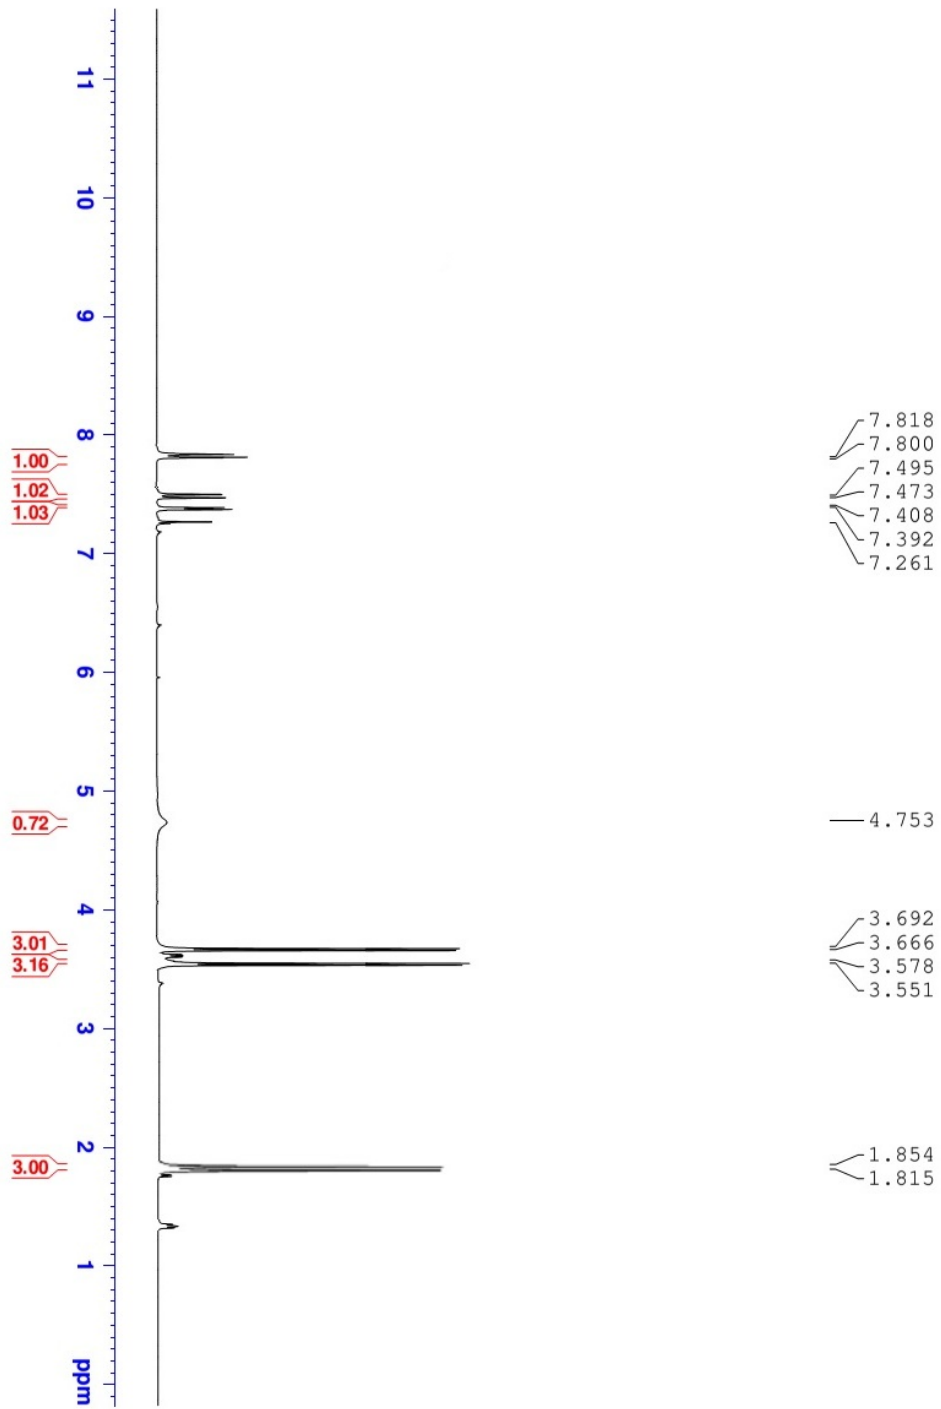

<sup>1</sup>H NMR of Compound 2i

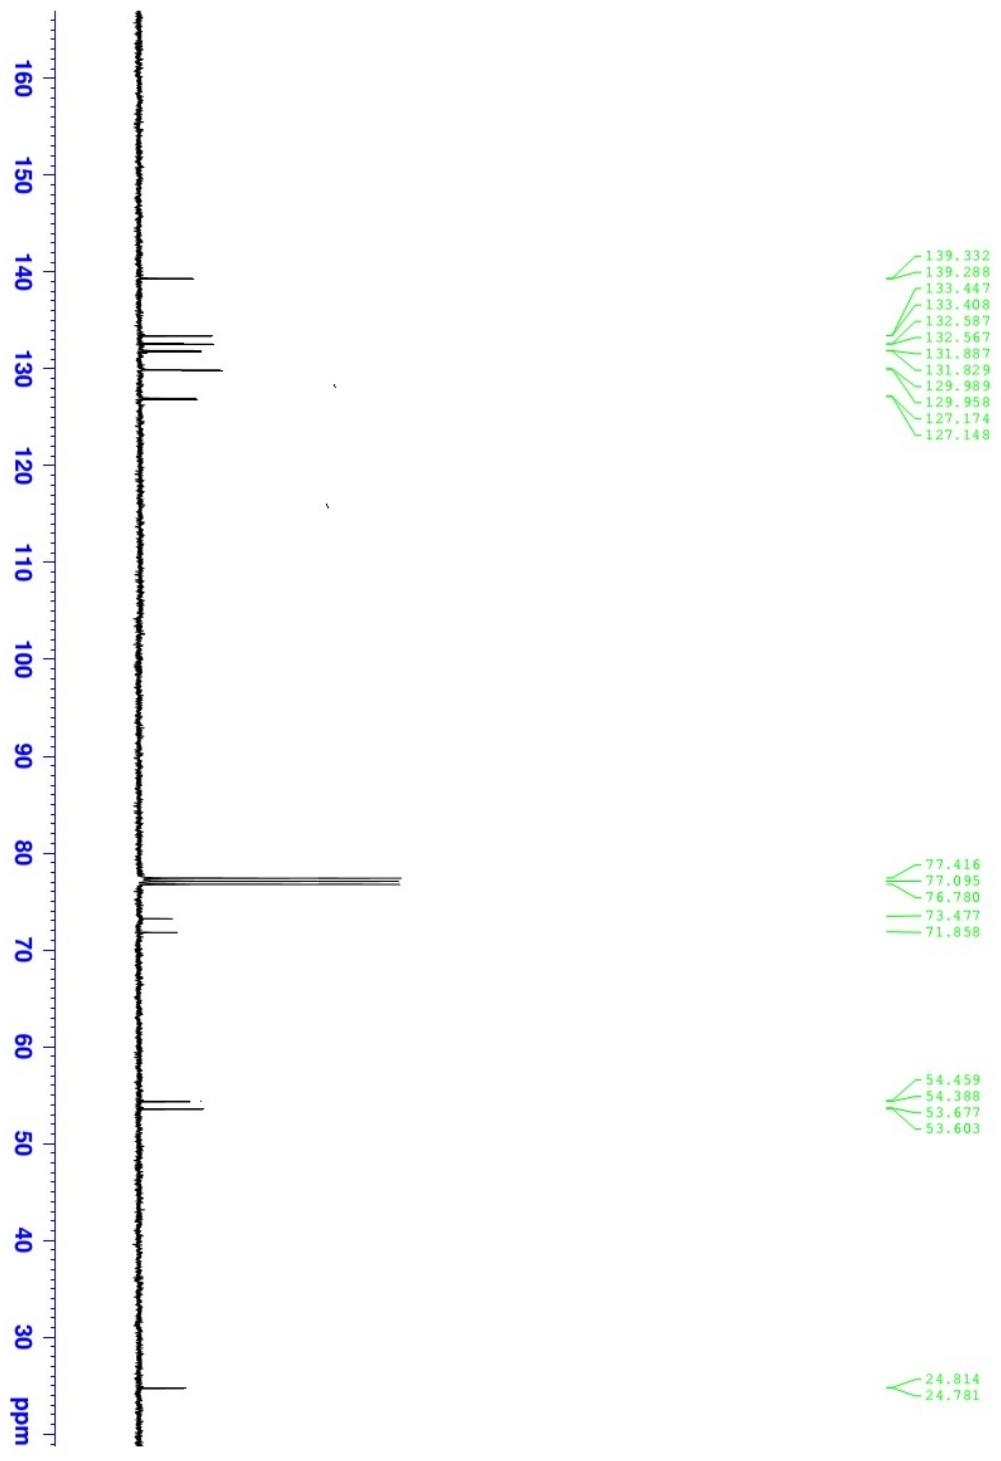

$^{13}\text{C}$  NMR of Compound 2i

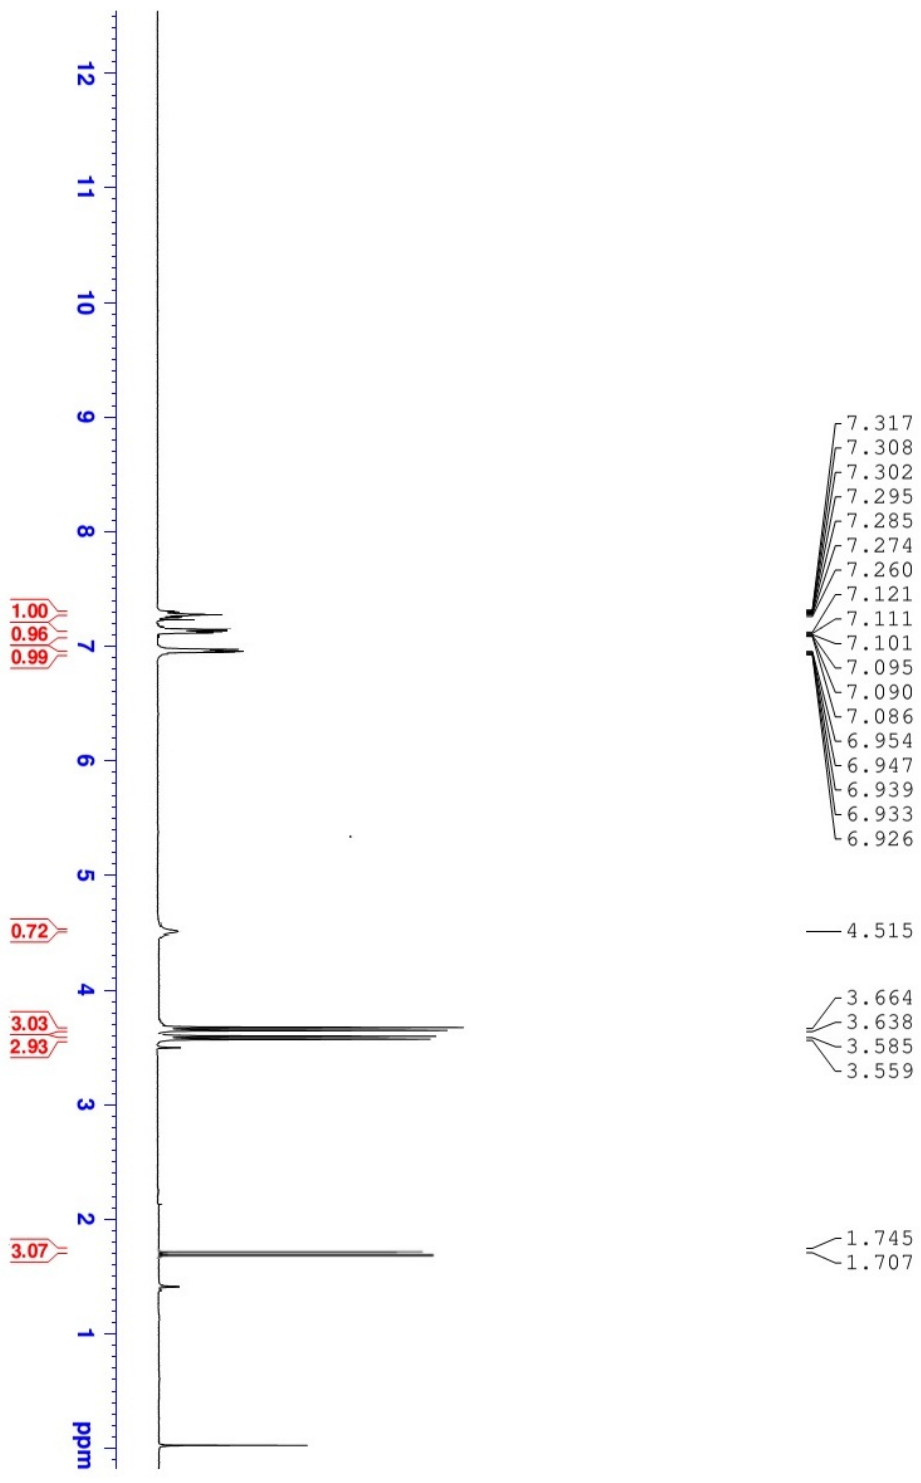

<sup>1</sup>H NMR of Compound 2j

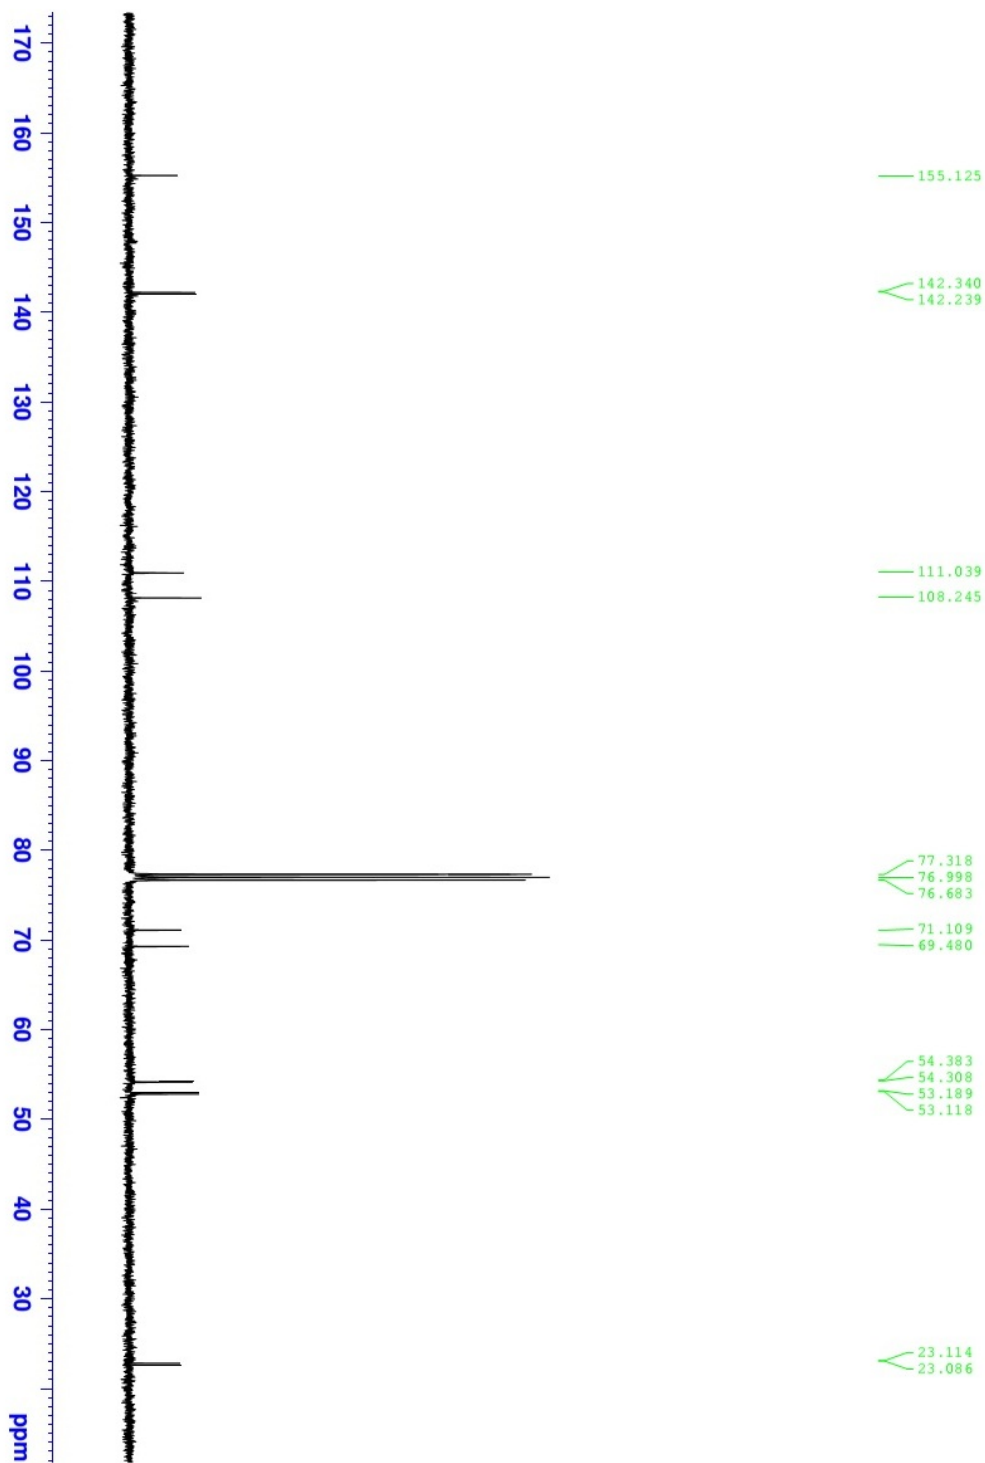

<sup>13</sup>C NMR of Compound 2j

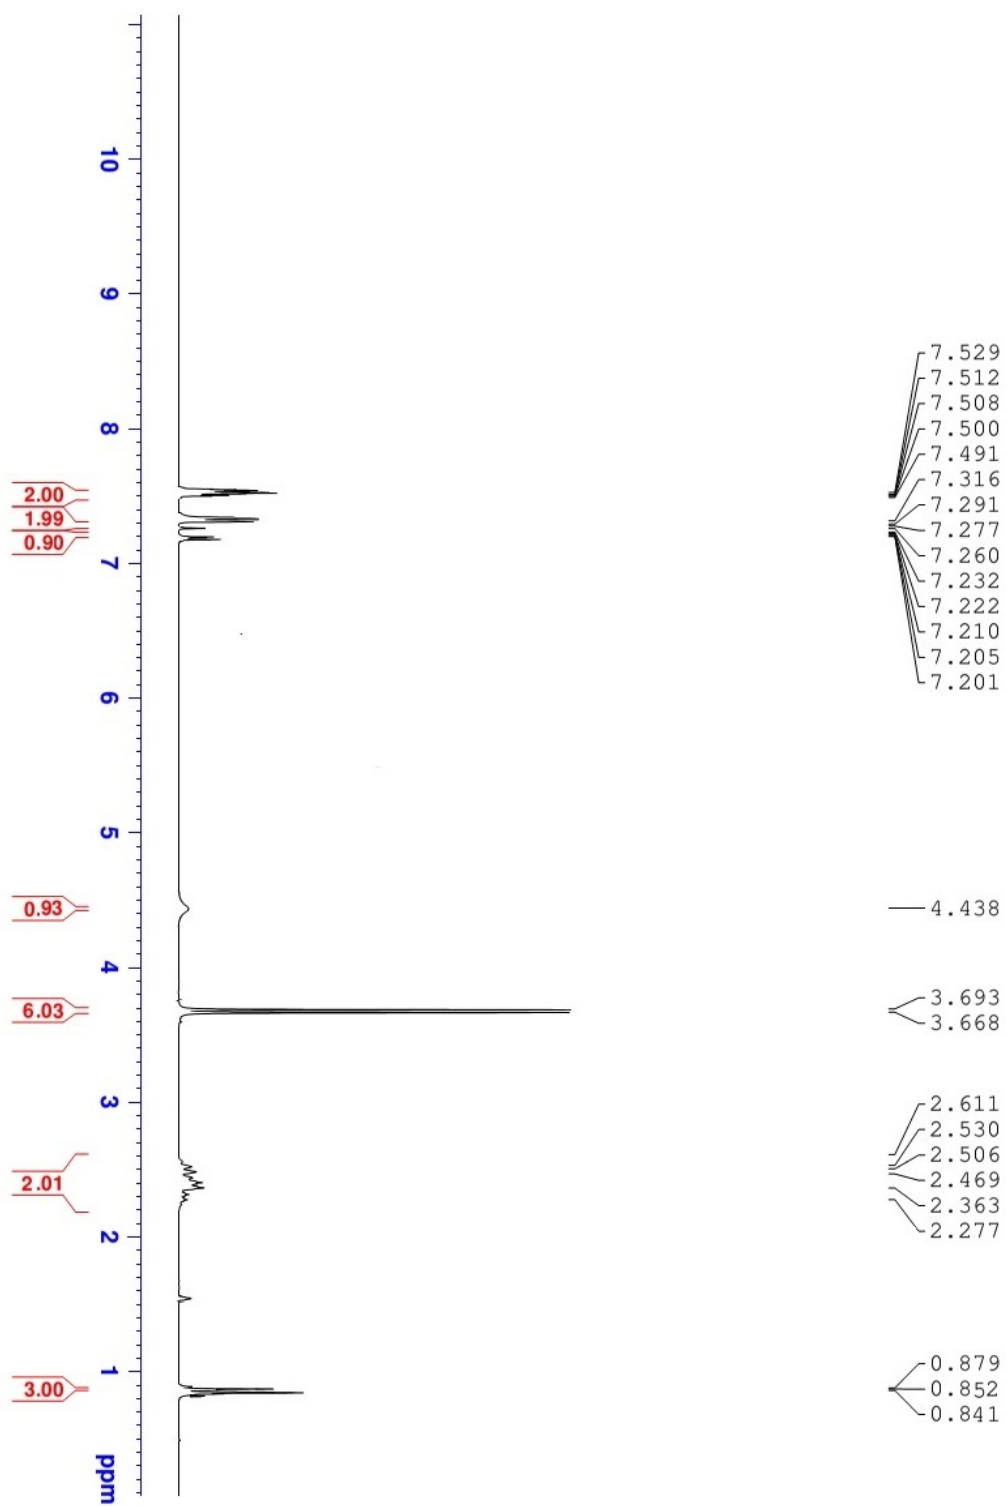

<sup>1</sup>H NMR of Compound 2k

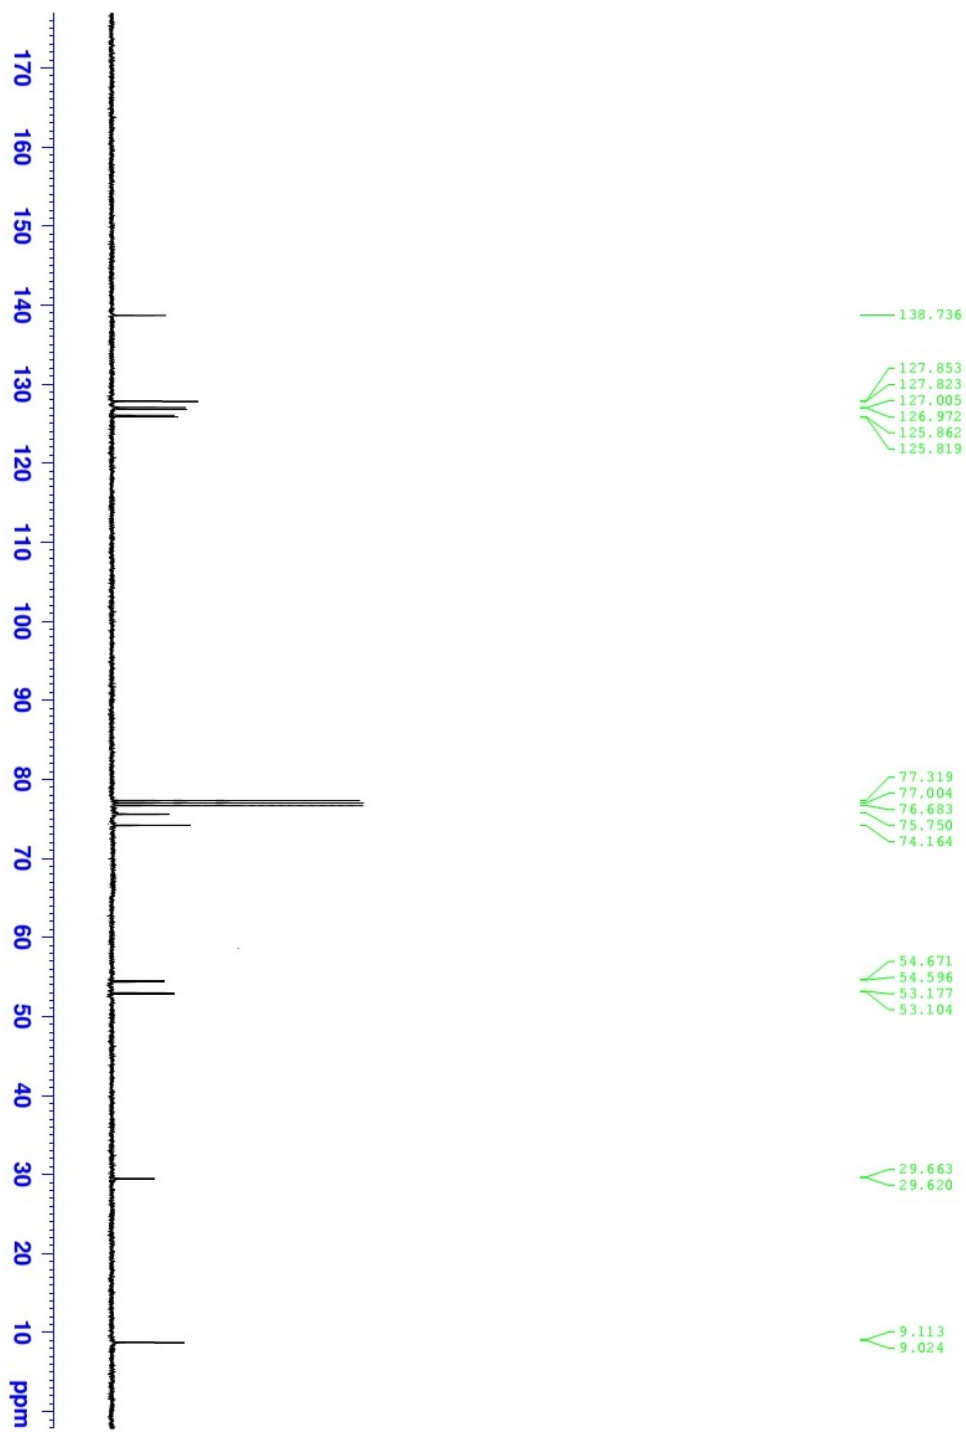

$^{13}\text{C}$  NMR of Compound 2k

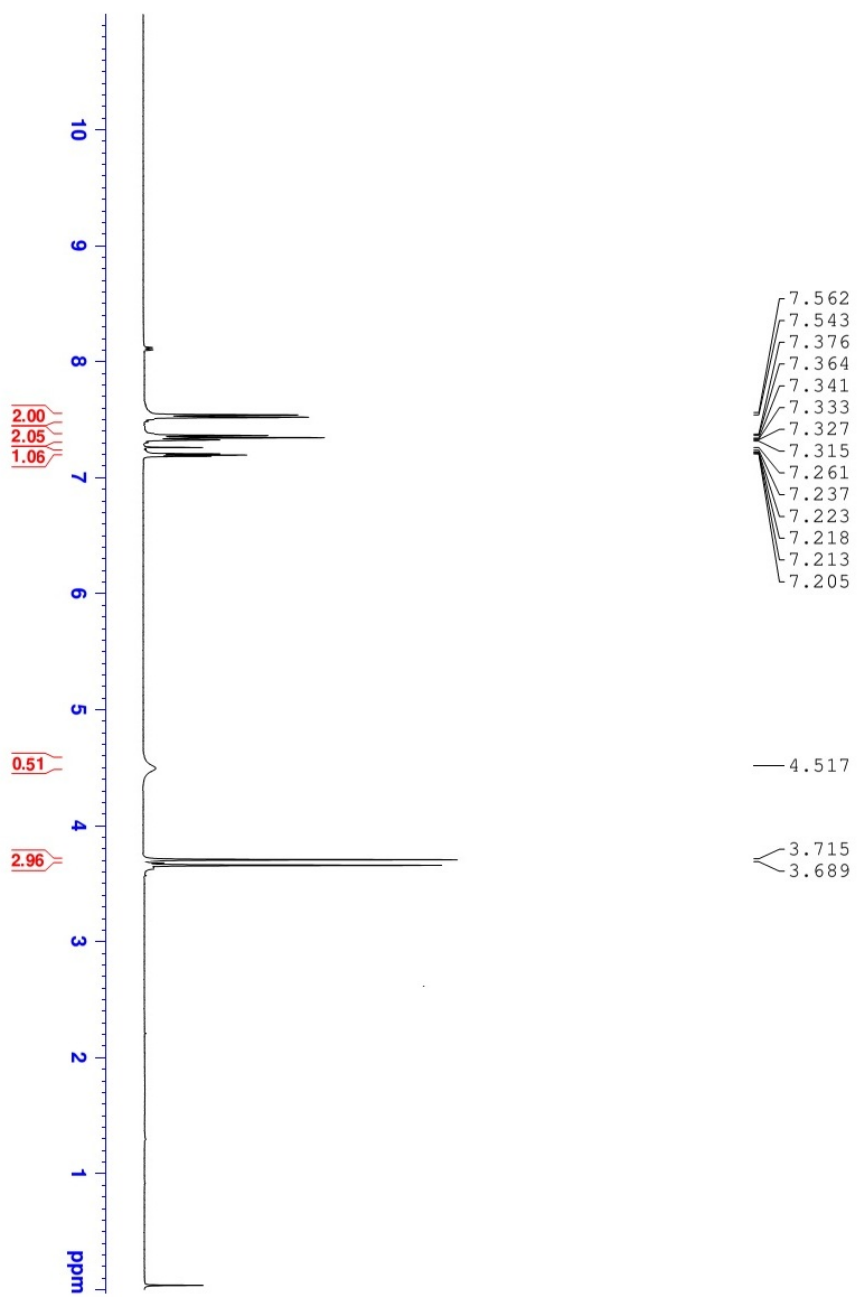

**<sup>1</sup>H NMR of Compound 21**

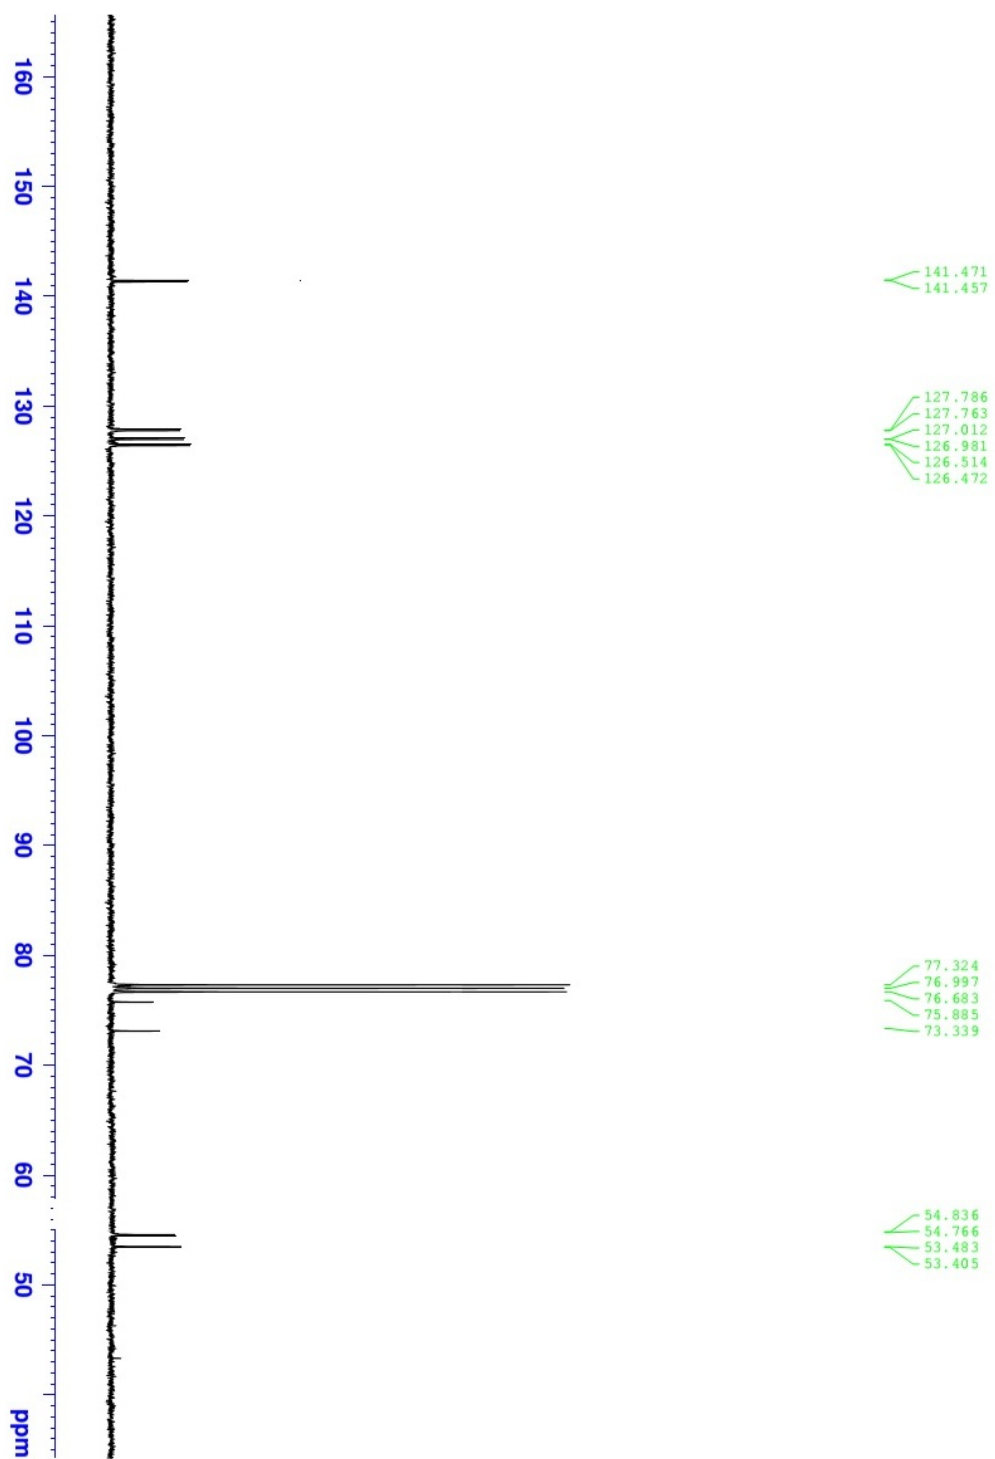

$^{13}\text{C}$  NMR of Compound 21



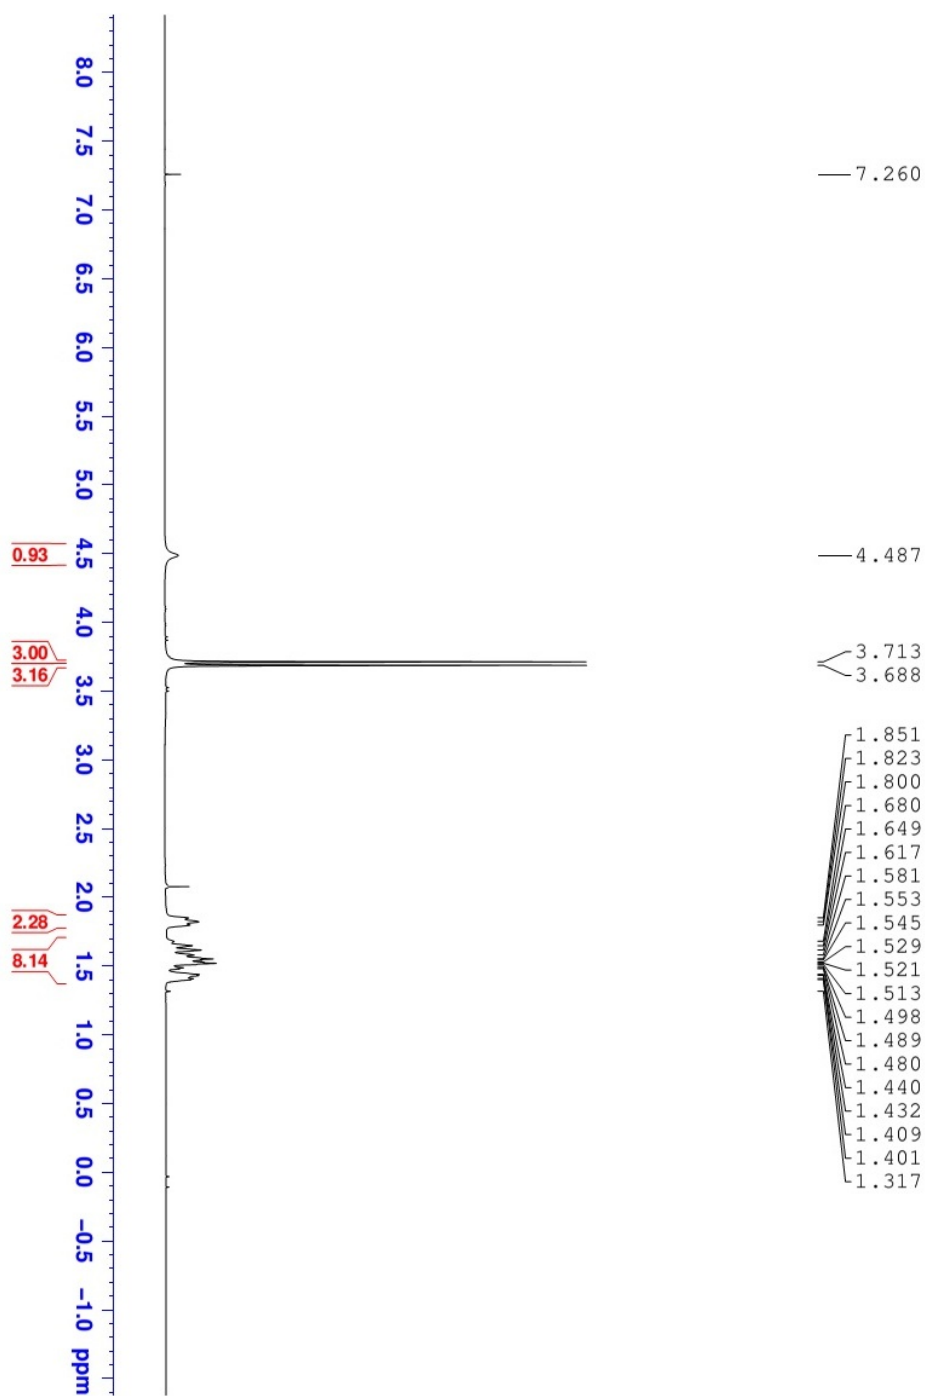

<sup>1</sup>H NMR of Compound 2m

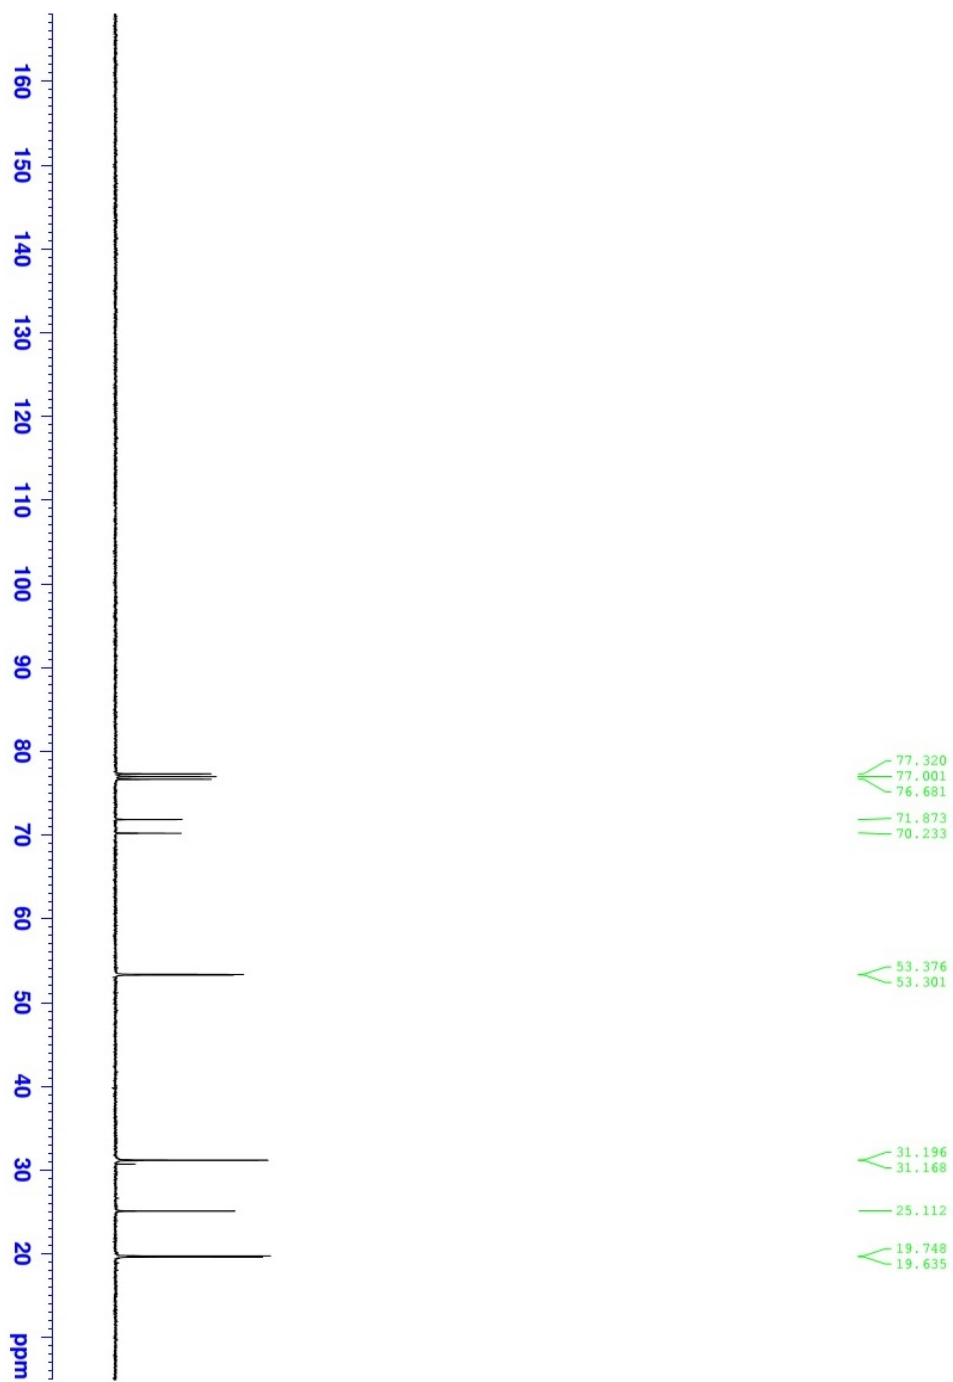

$^{13}\text{C}$  NMR of Compound 2m

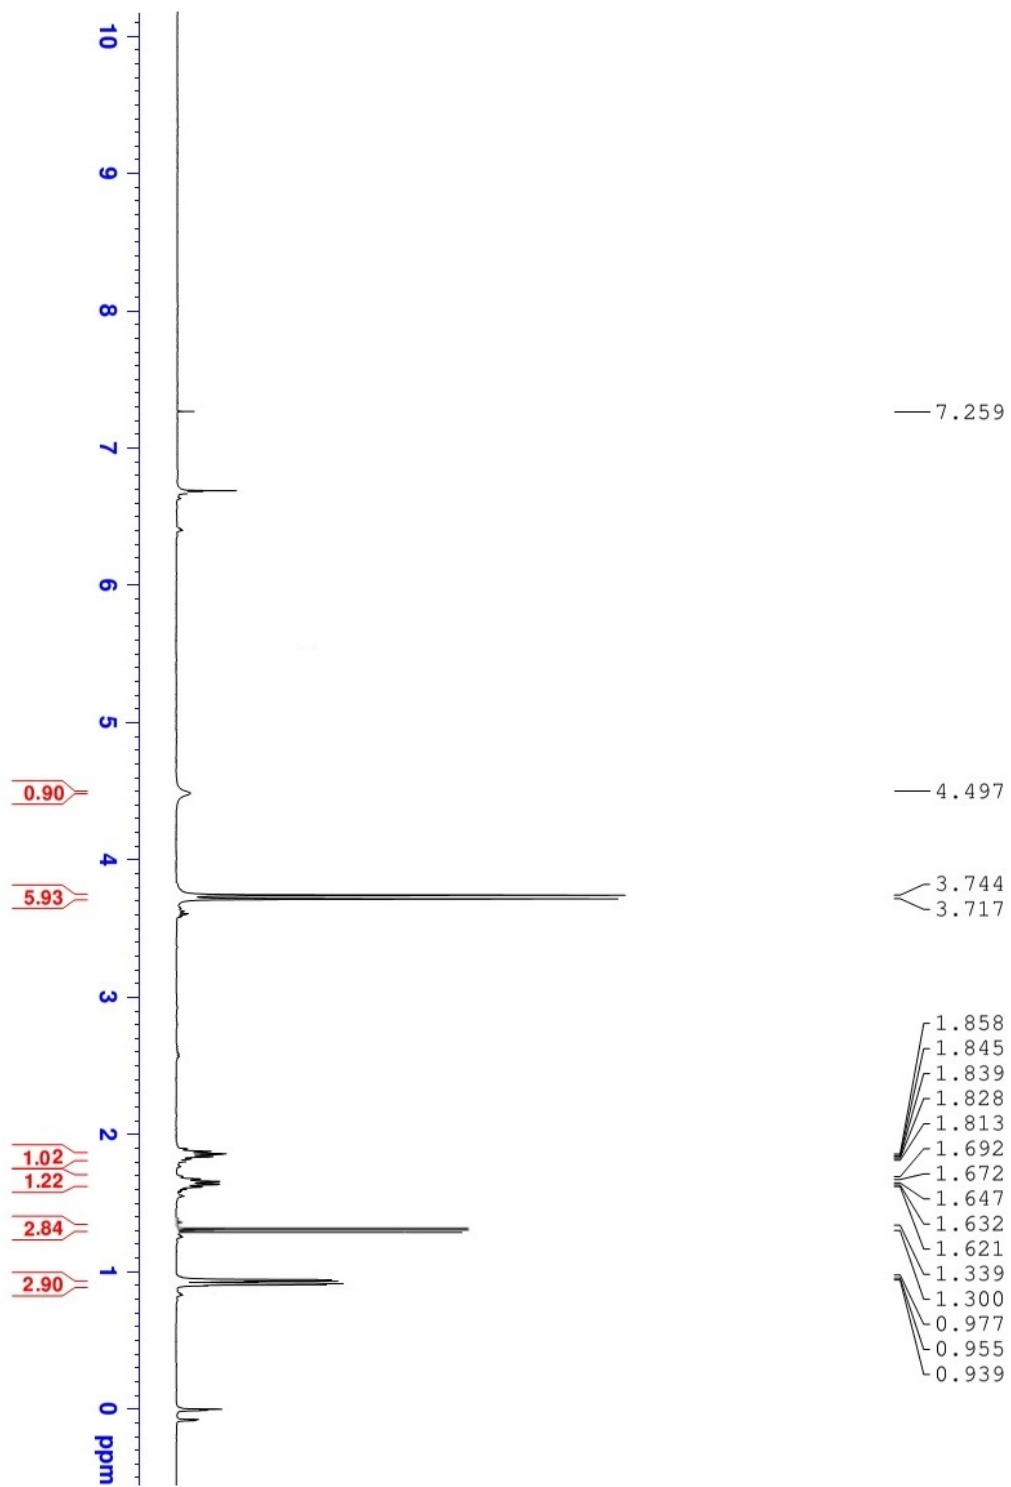

$^1\text{H}$  NMR of Compound 2n

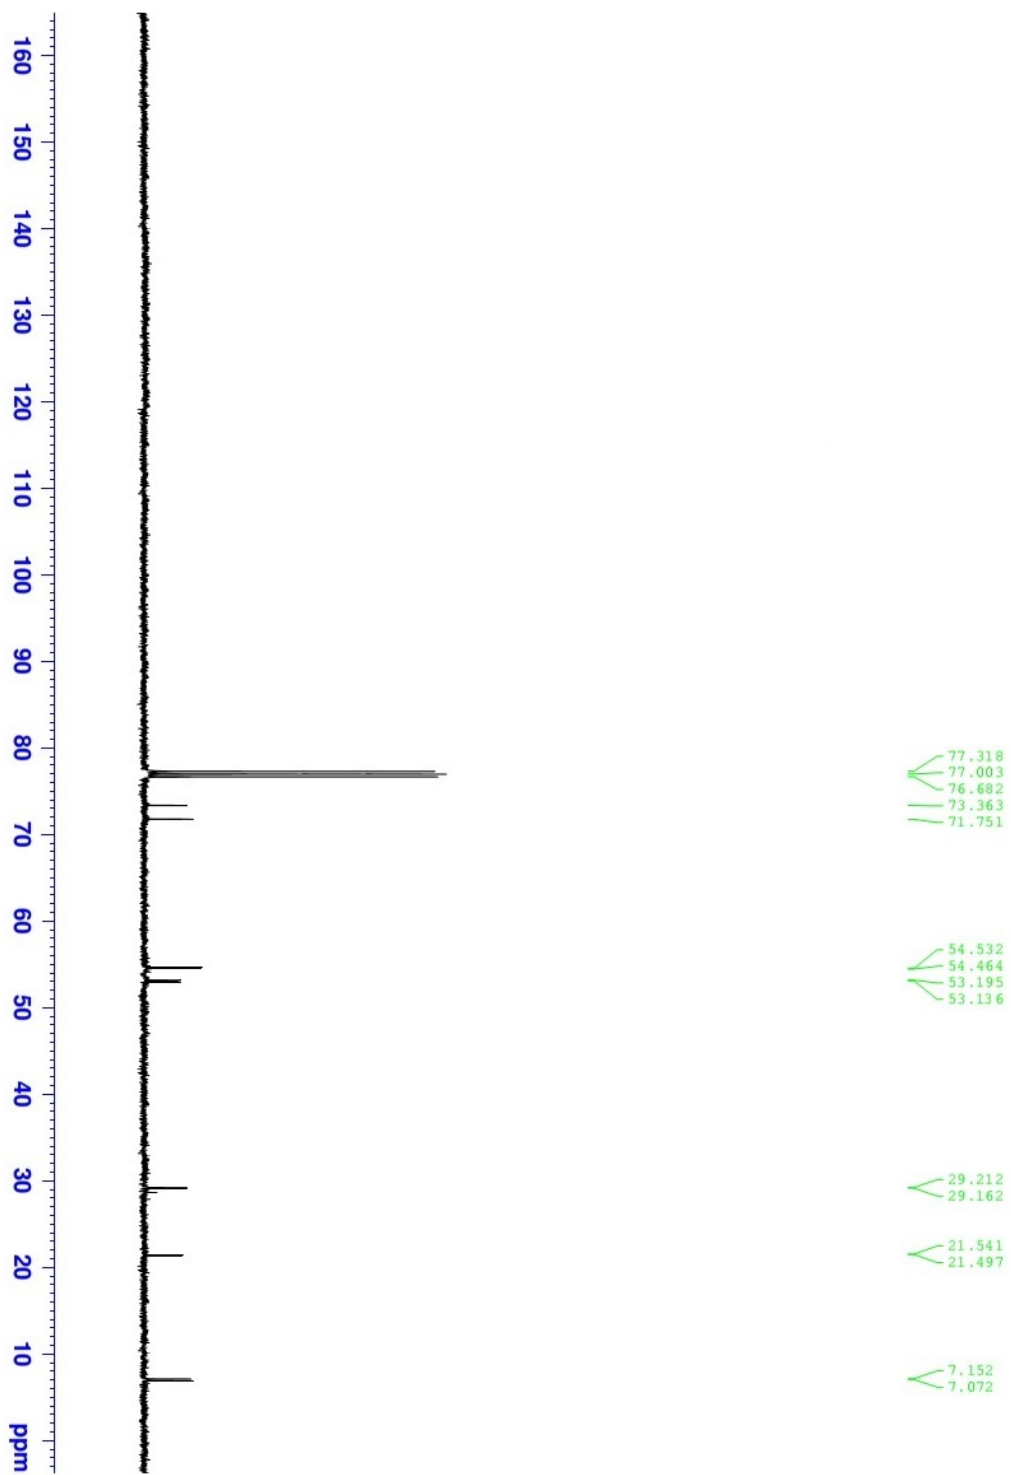

<sup>13</sup>C NMR of Compound 2n

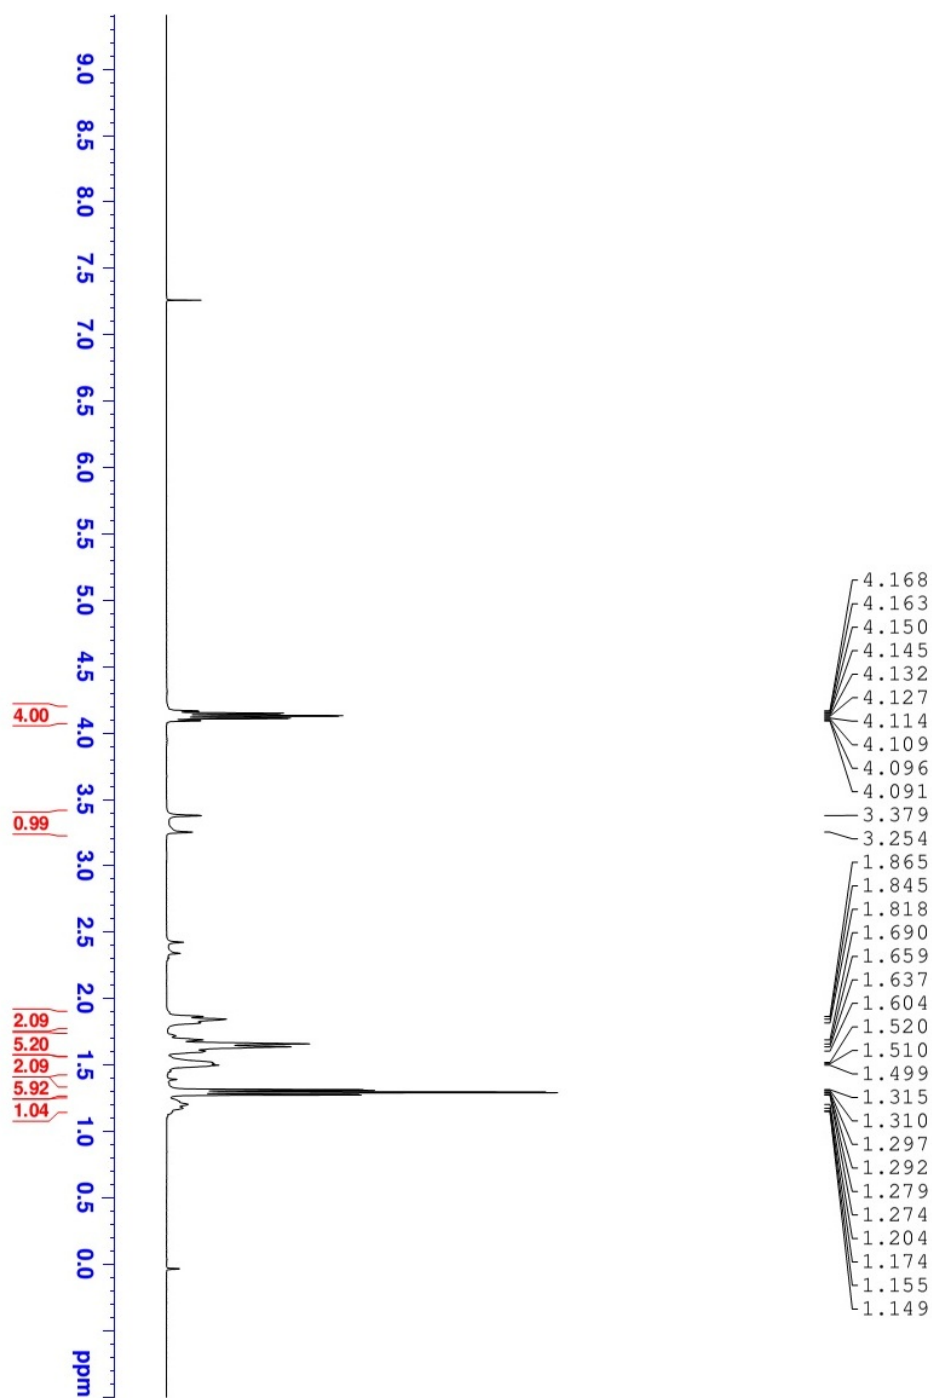

<sup>1</sup>H NMR of Compound 2o

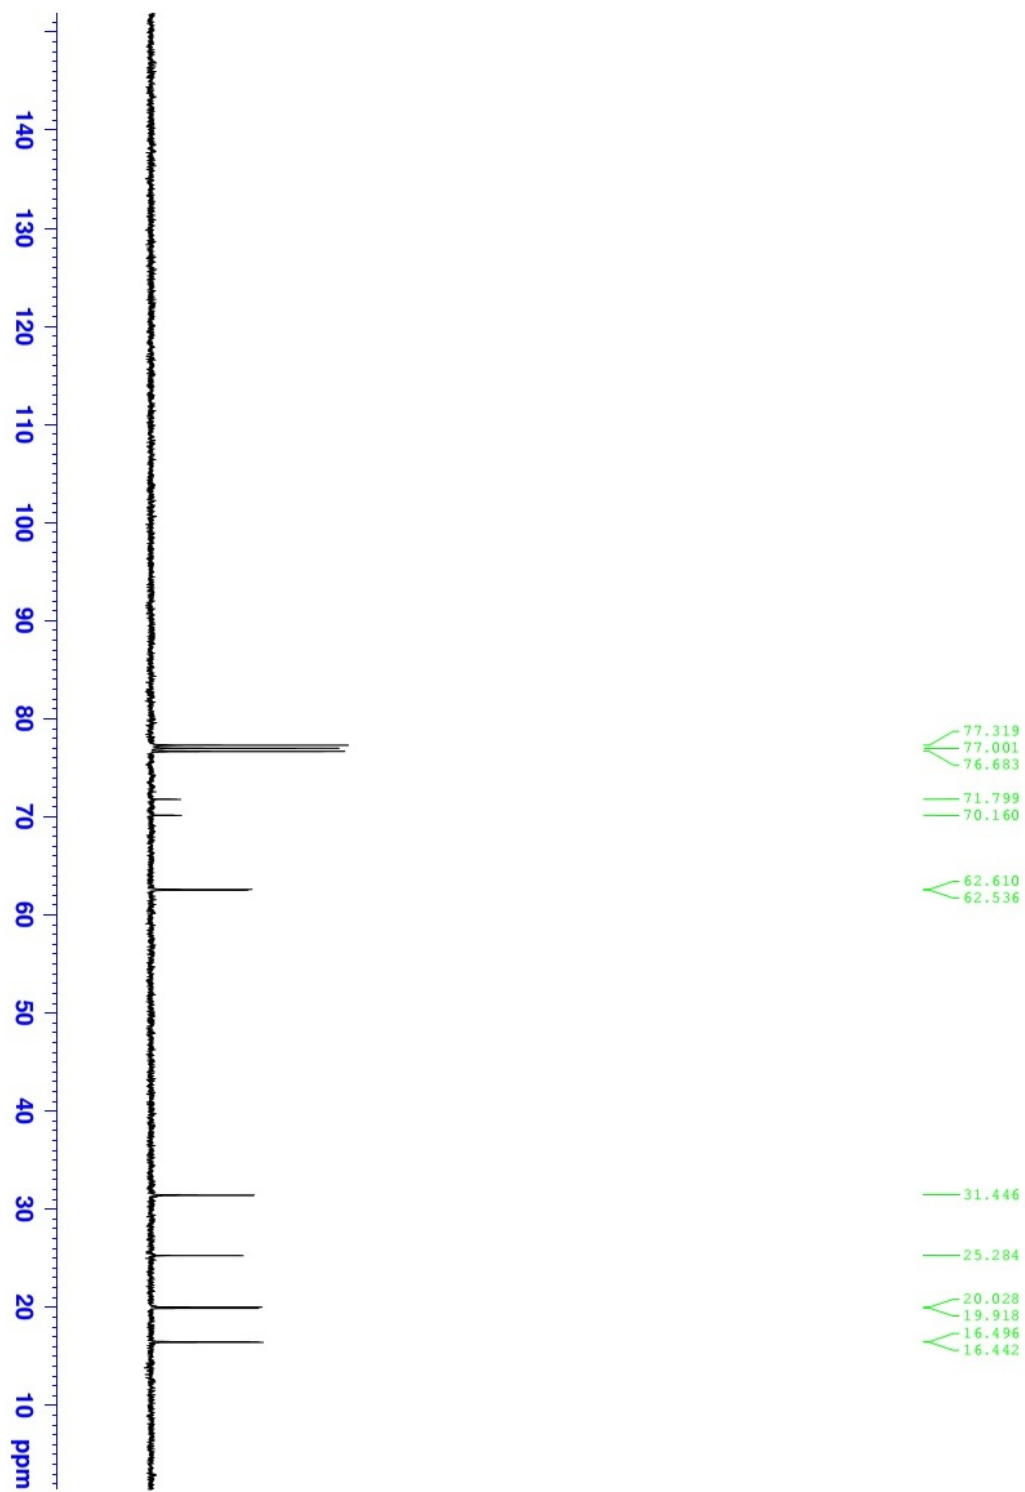

$^{13}\text{C}$  NMR of Compound 2o

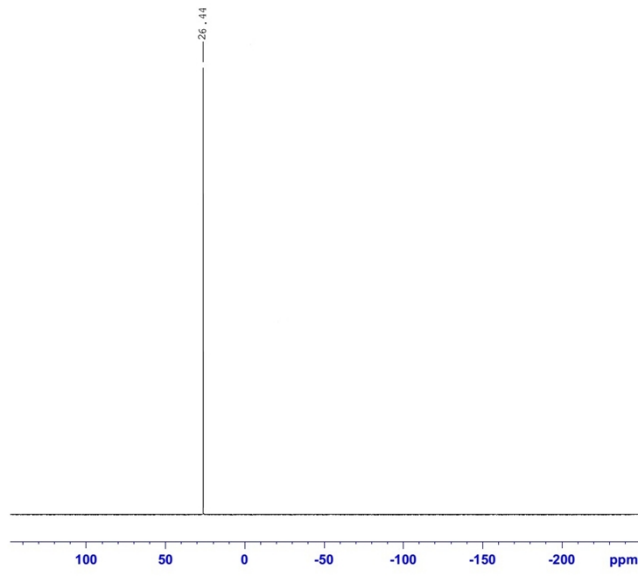

**$^{31}\text{P}$  NMR of Compound 2a**

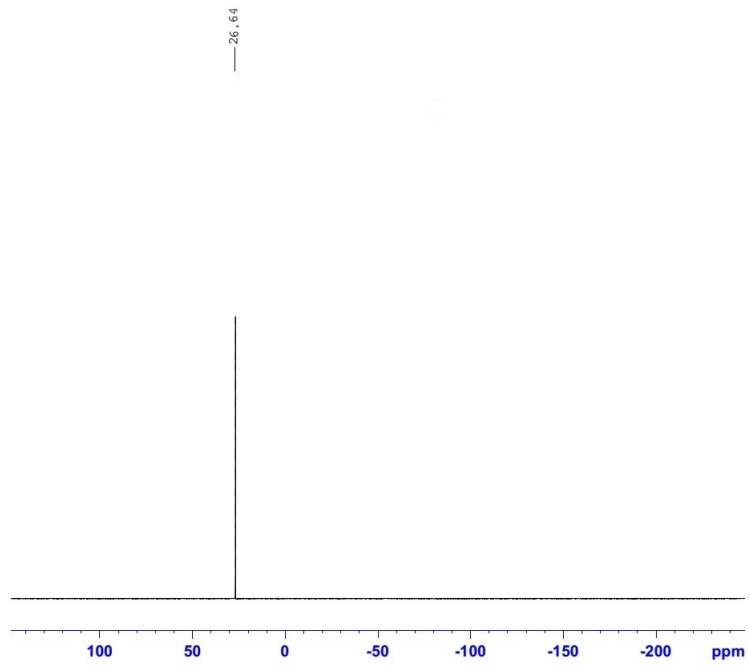

**$^{31}\text{P}$  NMR of Compound 2b**

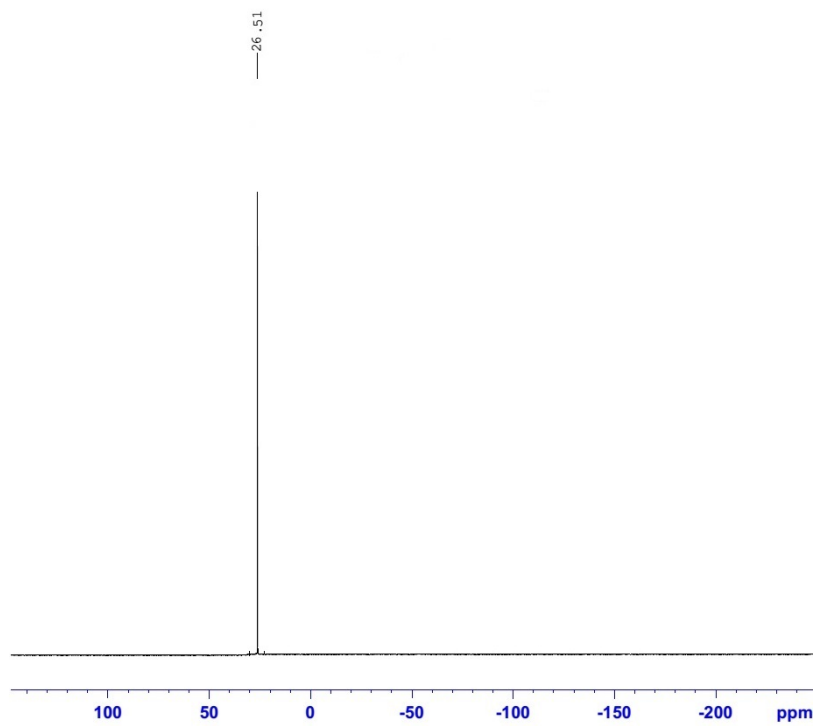

**$^{31}\text{P}$  NMR of Compound 2c**

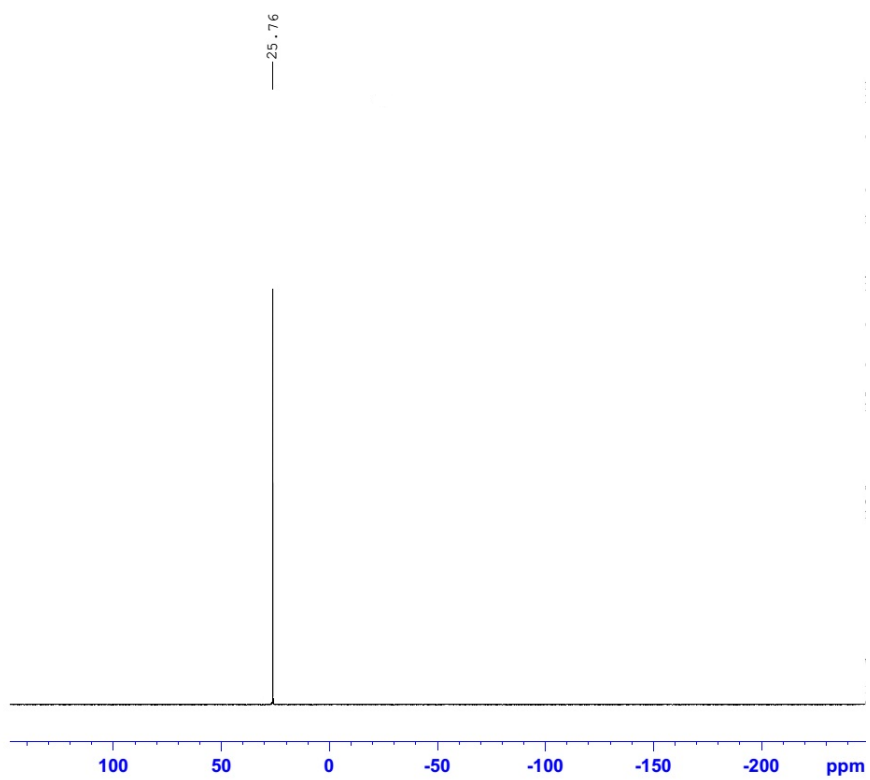

**$^{31}\text{P}$  NMR of Compound 2d**



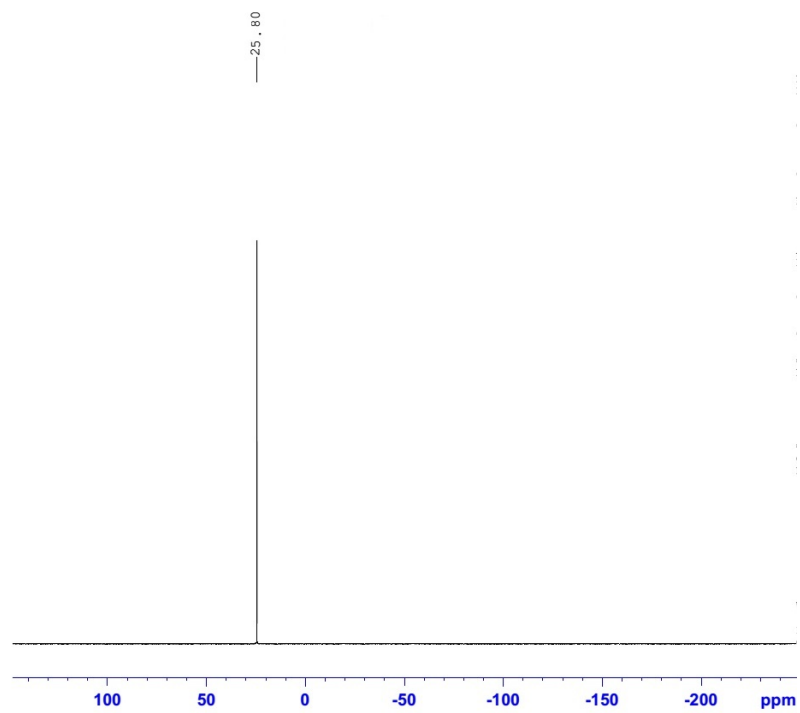

**$^{31}\text{P}$  NMR of Compound 2e**

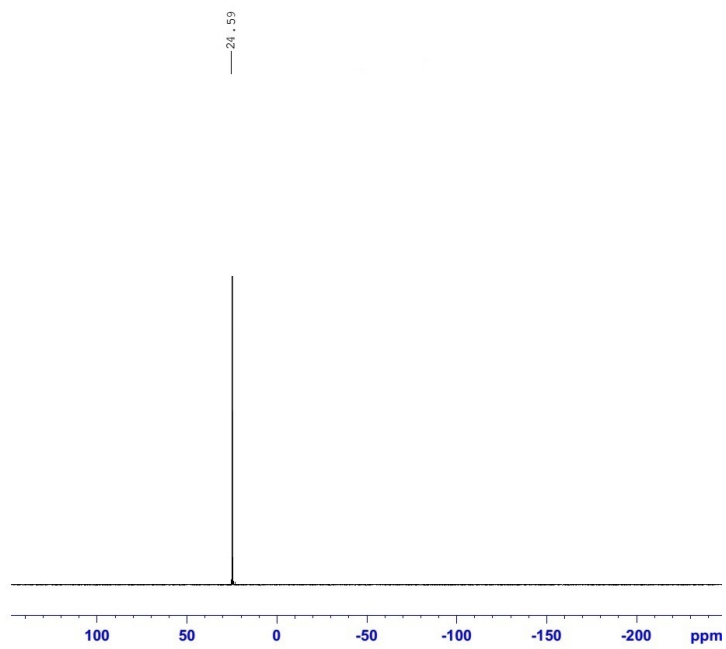

**$^{31}\text{P}$  NMR of Compound 2f**

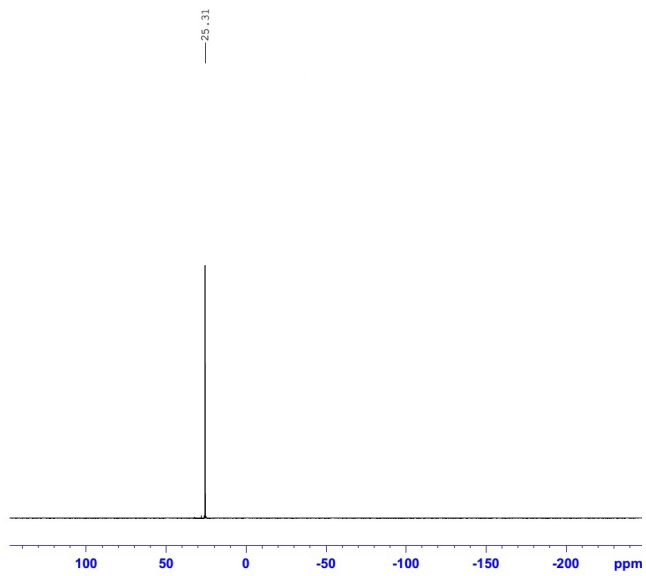

**$^{31}\text{P}$  NMR of Compound 2g**

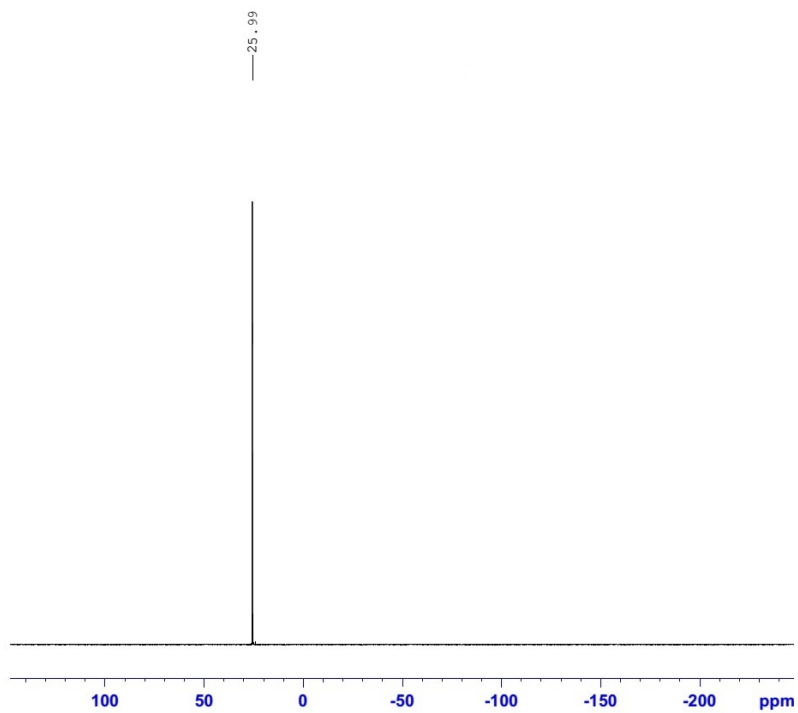

**$^{31}\text{P}$  NMR of Compound 2h**

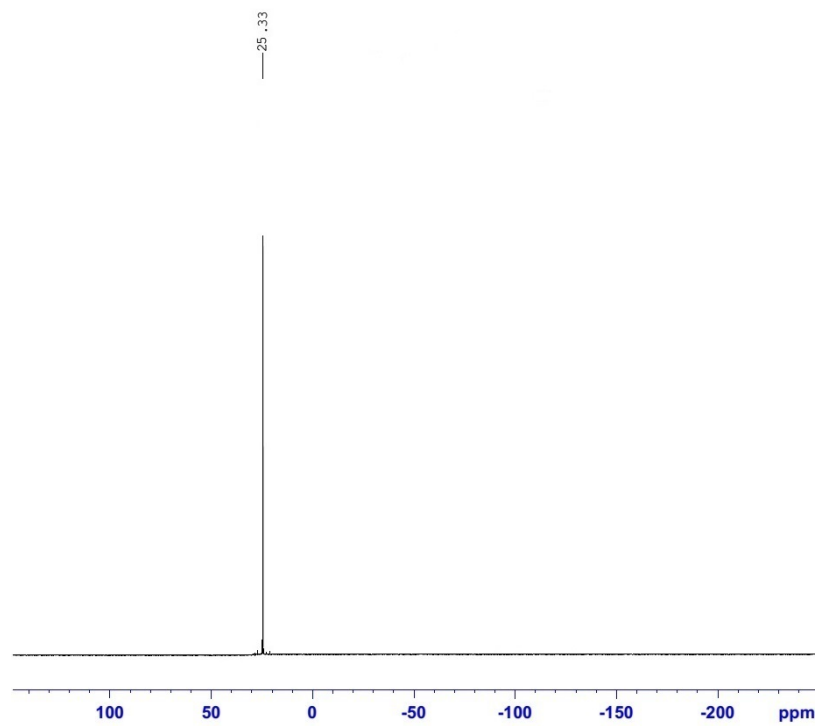

**$^{31}\text{P}$  NMR of Compound 2i**

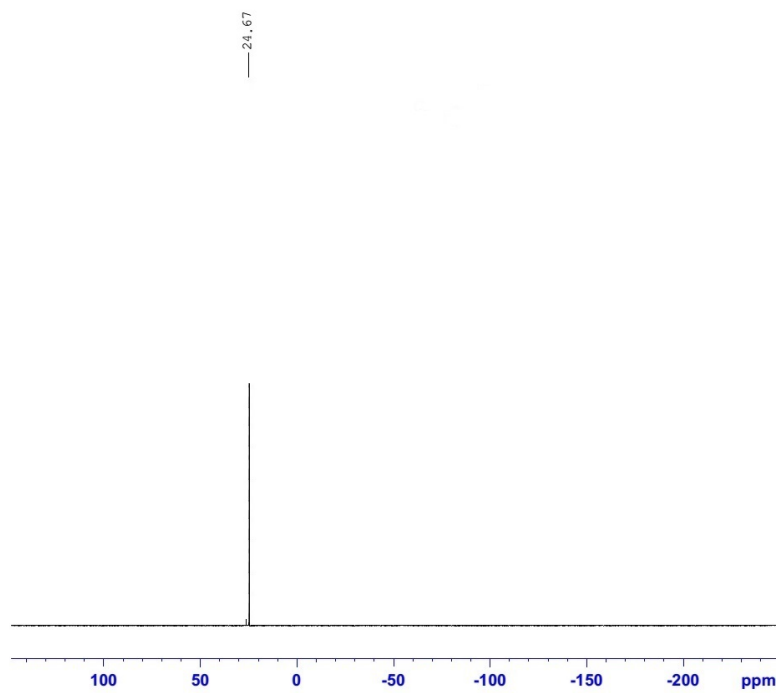

**$^{31}\text{P}$  NMR of Compound 2j**

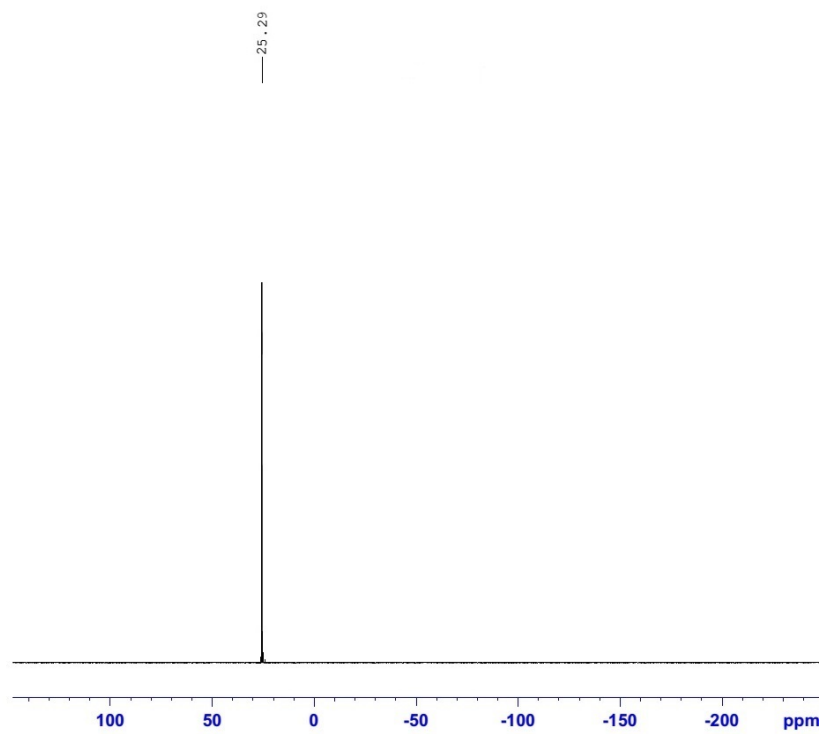

**$^{31}\text{P}$  NMR of Compound 2k**

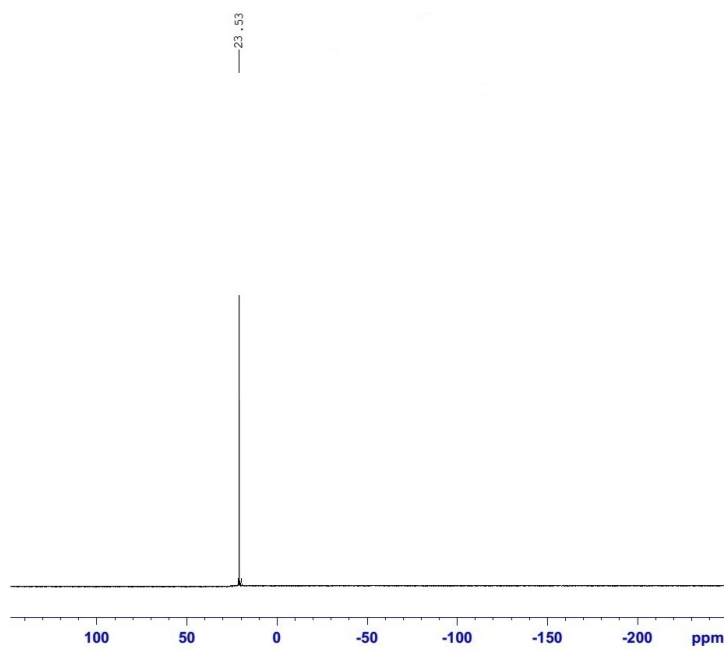

**$^{31}\text{P}$  NMR of Compound 2l**

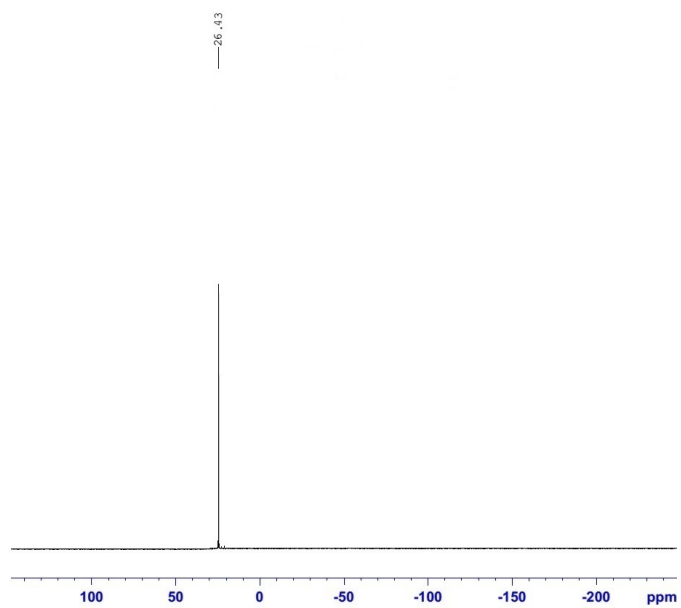

**$^{31}\text{P}$  NMR of Compound 2m**

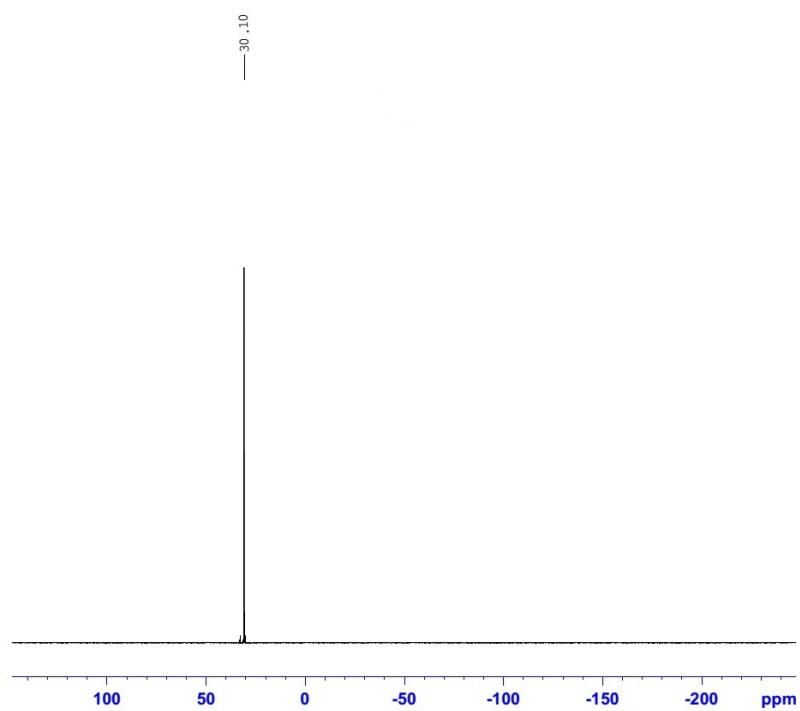

**$^{31}\text{P}$  NMR of Compound 2n**

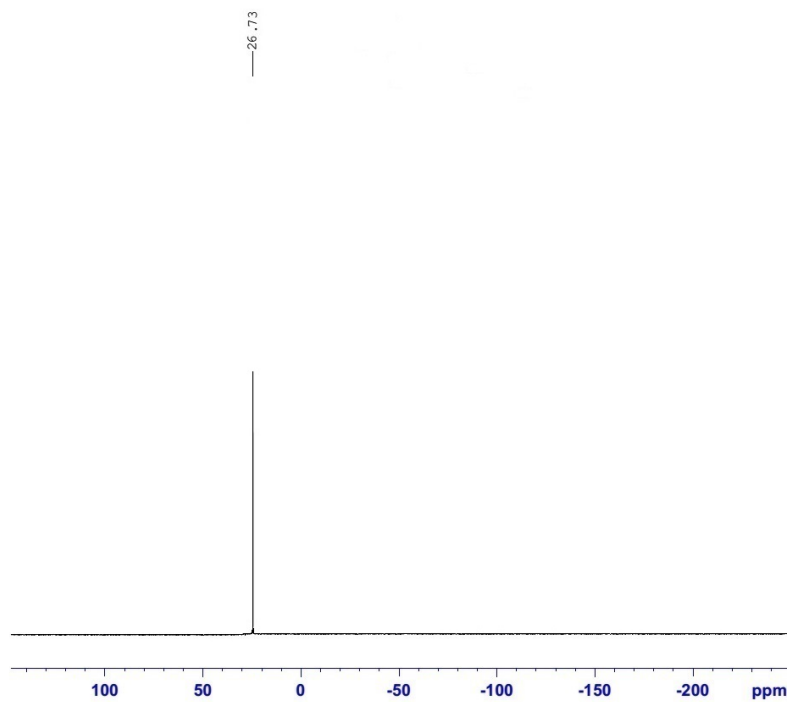

**$^{31}\text{P}$  NMR of Compound 2o**
